# Supplementary material for: A novel marker, ARM58, confers antimony resistance to Leishmania spp
Source: PubMed Central journal article supplement — Int J Parasitol Drugs Drug Resist. 2013 Dec 6;4(1):37–47. doi: 10.1016/j.ijpddr.2013.11.004 (PMC3940081; doi:10.1016/j.ijpddr.2013.11.004), 2013-12-06
Supplement: mmc1.pdf [file mmc1.pdf]

## Supplementary data 1: Restriction fragment length analysis of selected cosmids.

Cosmid DNA was recovered from populations after SbIII selection and used to transform *E. coli* DH5-alpha competent cells. For each selection 50 individual colonies were picked. The clones were grown and a cosmid DNA miniprep was performed. Cosmid DNAs were then cleaved with *EcoRV* and *XbaI*. Restriction fragments were analysed on a 1% agarose gel in 0.5 X Tris-borate EDTA buffer by field inversion electrophoresis. The gels were then stained in 50  $\mu\text{g/ml}$  ethidium bromide solution. Size marker mixes were run on both sides of the lanes, and the sizes [bp] are shown on the left. Samples with indistinguishable fragment patterns were assumed to be replicas of the same cosmid prototype. The distribution of the major cosmid prototypes (marked by designation) is represented in the pie charts to the right. Note that selection S1.1 was not stringent ( $25 \mu\text{M}$  SbIII) whilst S1.2 and S1.3 were performed at  $90 \mu\text{M}$  SbIII. Cosmid C1.6 and its replicas could be aligned with DNA sequences on *L. braziliensis* Chromosome 20. The "cosmid" marked with asterisks turned out to be a gene replacement plasmid constructed elsewhere in the lab, and thus a contamination.

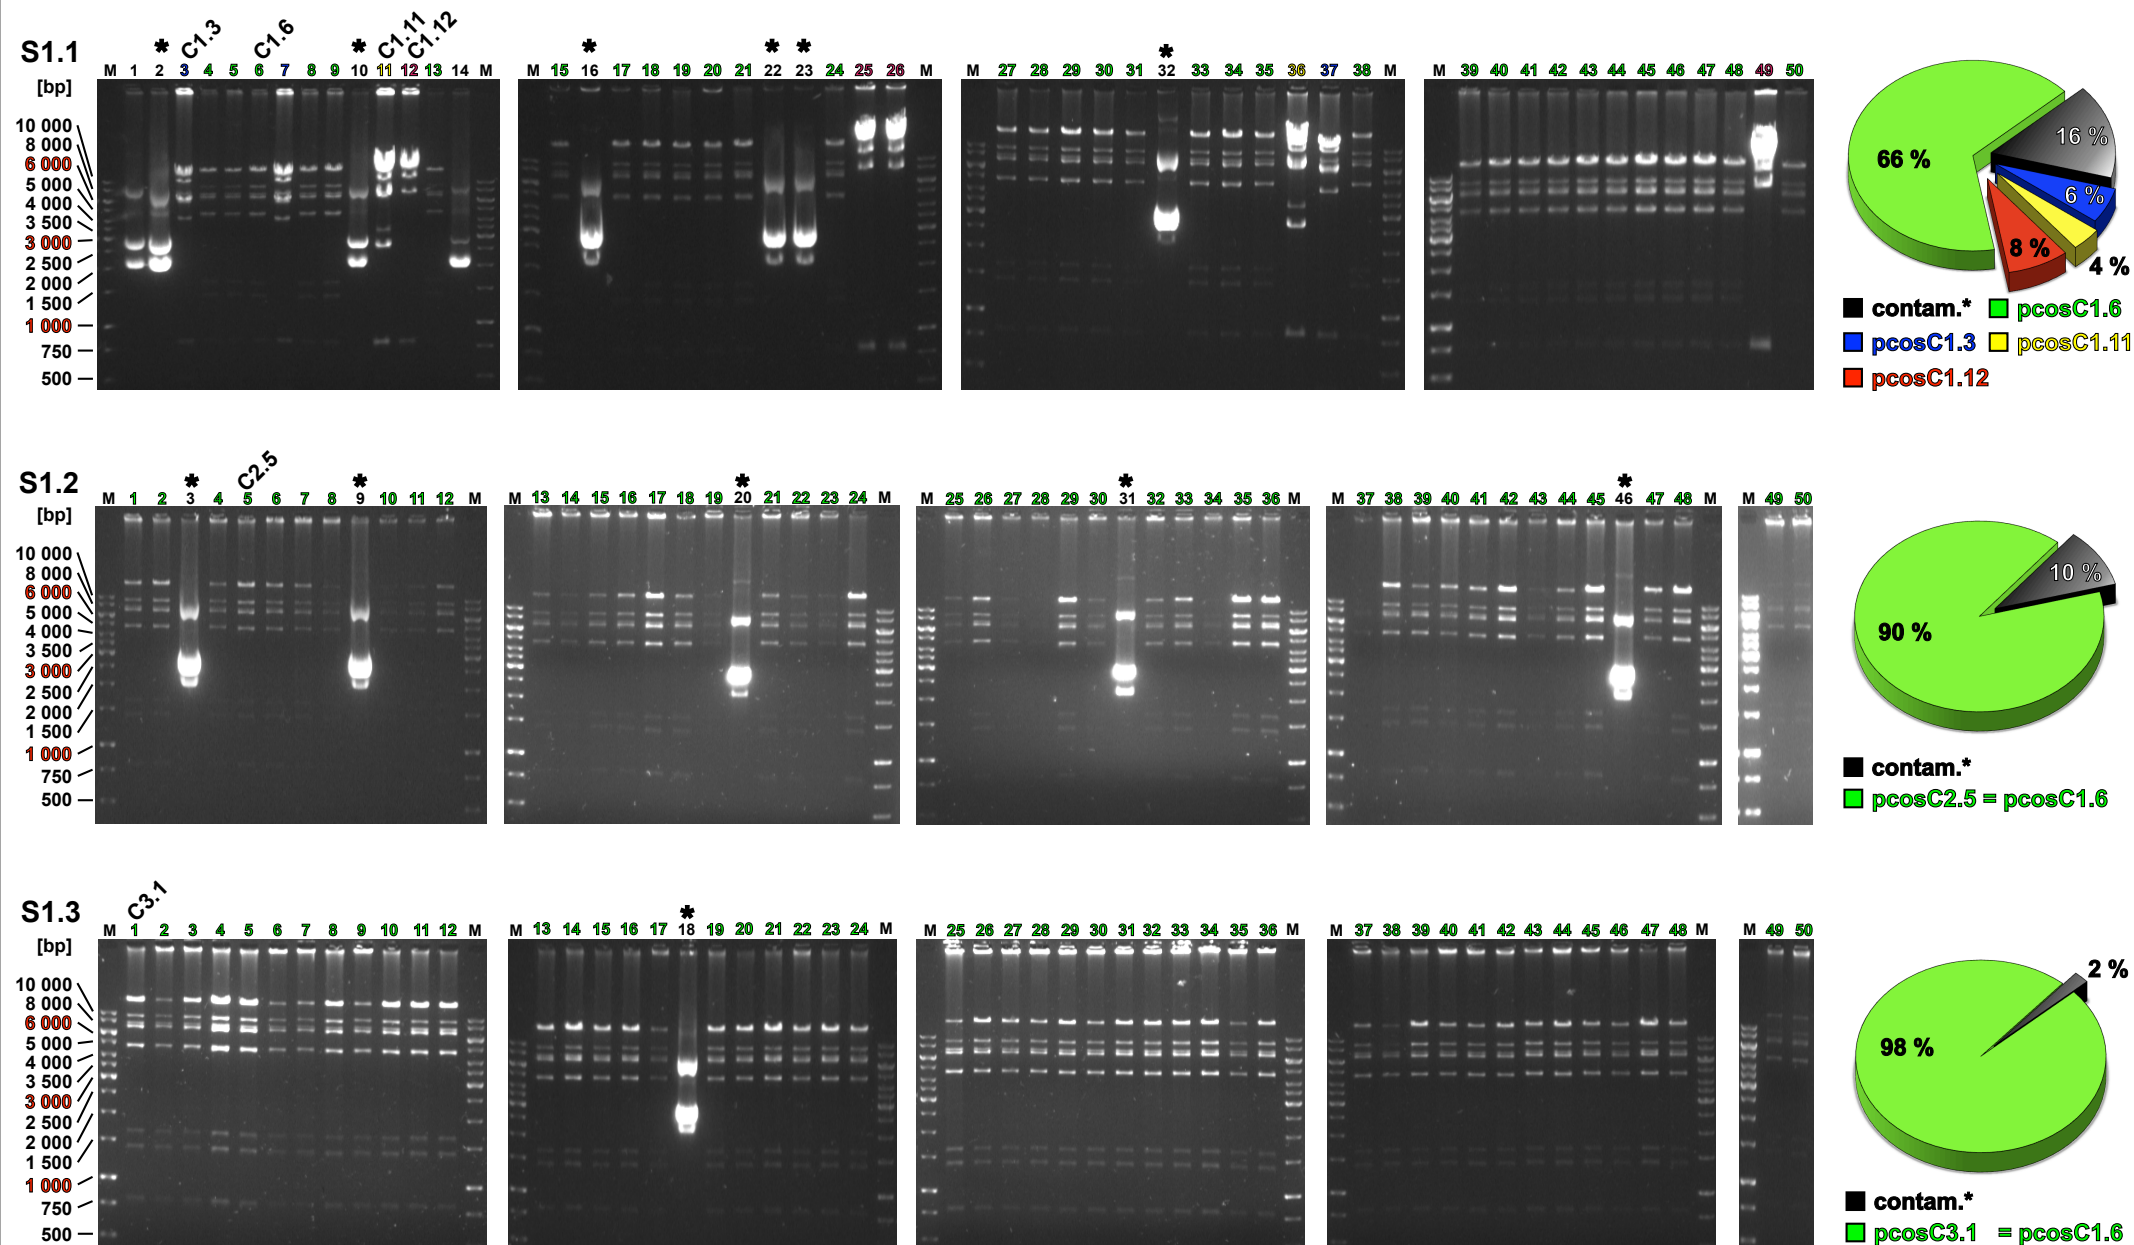

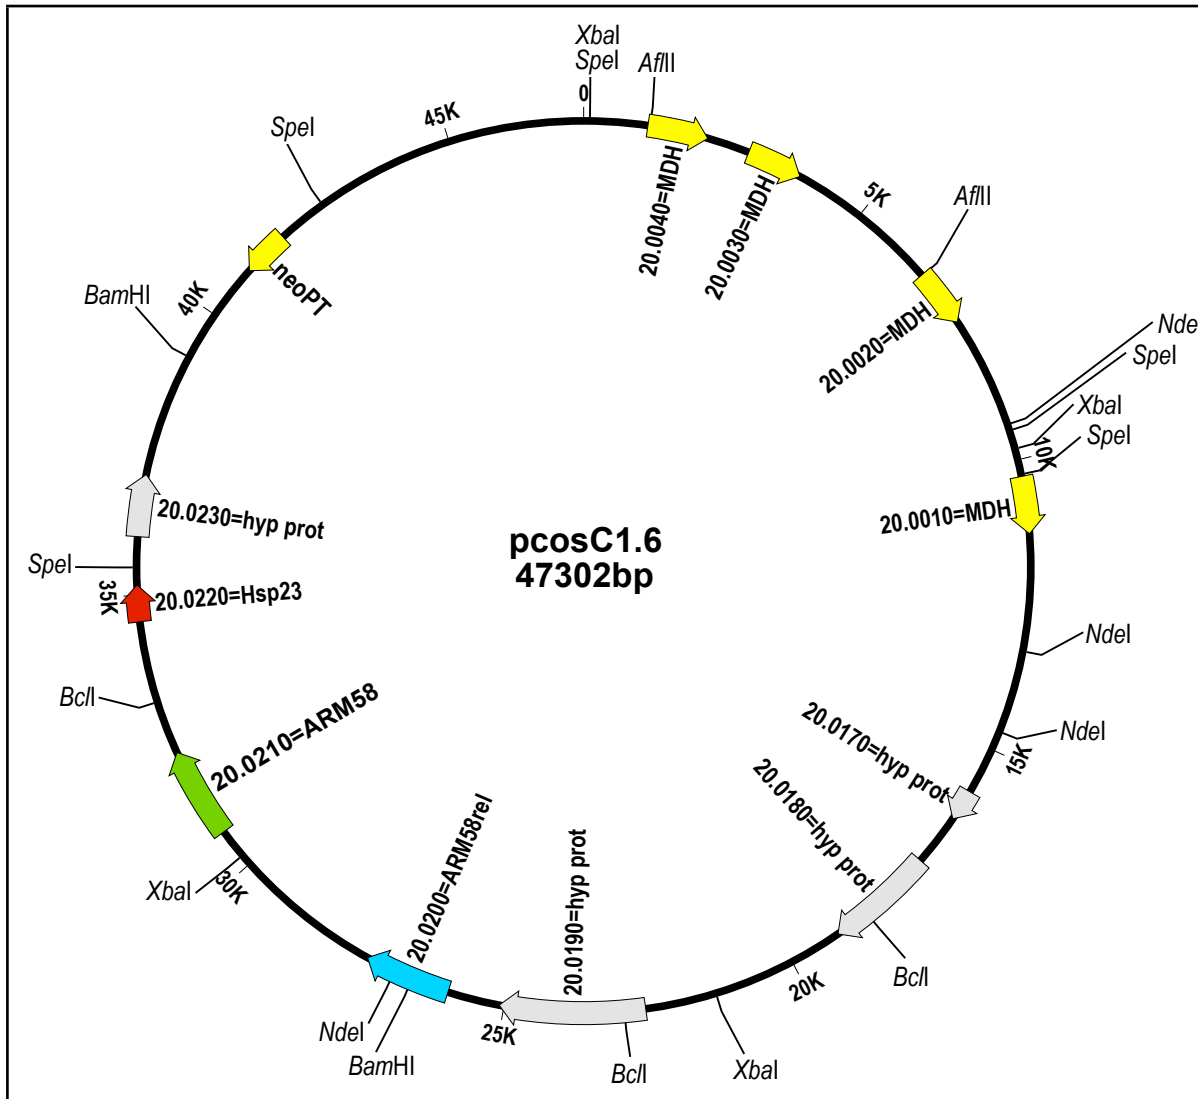

**Supplementary data 2:** Physical map of cosmid pcosC1.6. The ruler shows the relative position in [kbp]. Gene identifiers refer to systematic numbers from the *L. braziliensis* genome project (LbrM.20.xxxx). MDH=malate dehydrogenase; ARM58=58 kD antimony resistance marker; ARM58rel=ARM58-related; Hsp23=23 kD heat shock protein; NeoPT=neomycin phosphotransferase. Restriction sites relevant for derivative construction (3.7) are marked.

### Supplementary data 3: Sequence of pcosC1.6

Range: 1 to 473023

```
TTCACACAGG AAACAGCTAT GACCATGATT ACGCCAAGCG CGCAATTAAC CCTCACTAAA GGAACAAAA GCTGGAGCTC CACCGCGGTG GCGGCCGCTC 100
TAGAACTAGT GGATCAGCGG GTACATACCT GCTACAGGAG GGATGGACAG AGGAGATGCC GCGGAGTGAC CCCC GGCAAC TGCCTTCTG ACTGTGCGGG 200
CCTTTTCGCG TACCGCTGCG CGCGAACACA CAAACGCCTA CGTATGTGCC TCCCTCTATG TCTCTGTACG TCTCCGTACA CCCCTTTTTT TTTCATGGAT 300
GTGTGCTGCT GTATTCGTGT GCTCGTTGGT GAGCACATCG TTACCCTCAC AGGCACAAAC GTATGTGAAT GCGCGAAAGG AGGTATGCCT TTGGCTTGCT 400
GGGGTCACTG TACGCTGCCC CTCGAGGTGT GATGAGGGTT GGTTCCTCGGC AACAGAAAAG GGCTCGCAAA ACGAGAGTAG ACCAGCGAGT GCCTACTTGG 500
TCTTCGCTGC CCCCCCCCC CCCCTCTTGC CCCGCCACCT CGCTGTGTCT CTGCTGATGG AGAGAGTGTG CTGAGAGGAT GCGTTCGTGT CGTTACTGTC 600
CTCTTTTCGA CGCCTTCTGT CGCTGTCTTT GACACAGTGC CGGCGAAGCA CCGTGTGGTG GCTAACACGC GCGCCGCGCG TCATGTAACG TGTATTCGGG 700
TTCGGCTCTC CGTGCTGTAG CTTTAGTGTG GTGTGATGGG GTGCTGCCTT ACGTGATCGT TGTGTGTTTT TGCTTCTCTT TTTTCTCGTT TTGGTGCATC 800
TGCCTGTTTT GTCTCTCTTC CTCTTCTCCT CGGCATGCAC CCCGGTTGCT CACCCCTGGT GCCTCTCCGA CCTCCTCGCT TGCCACCCA CAGCGCATTG 900
GTCCGCGATC ACCTTCCCAC GGACAGCACC ACACGTATTT TTGTACCCTG TTGCCGCACC CCAGCCTGCC CGACTGCGTG GACAGCGACT TCCGCGCGGA 1000
CGCCAAGCGA AAACAAAAAA GCTGCGCACA GCACCCACCC TGAGCACACA GACGCACGGG CACACACAGA CTTGGCACAC TTTGTTATGA GCTTCCTTTT 1100
TCGCCGCTCC CCGGCGGCTC TTAAGAAGGC CAAGGTGGTG CTCTTCGGCT GCAACAGCGC GGTAGGCCAG CCGCTCTCAC TCTTGCTCAA GCTGAACCCG 1200
CACGTAGAGG AGCTTGTGTG CTGCAGTACC GCCGCTGACG ATGACATGCC CGGCGCCGGT ATCGCCGCGG ACCTCTCTCA CGTTGACACA TTGCCGAAAG 1300
TGCATTACGC CGCTGACGAG GGGCAGTGGC CGGTGTTGCT GCGTGATGCA CAGCTAATCC TTC'TTTGTTT CGGCAGAAGC TTCGACCCTC TTCACCAAGA 1400
CAGAGACAGA GTCCTCAAAG TAGCTGCCCC GATGGCTCGT CGCATCATGG ATGCGGTCGC GGCTTCCGAT GCGAAAGGAA ACATTGCTGT CGTCTCGAGT 1500
CCTGTGAACG CTCTCACCCC GCTTTGCGCA GAGTTTCTGA AAGCGTCAGG CAAGTTTGAT CCCC GAAAAC TCTTCGGCGT CACCACGCTC GATGTGATAC 1600
GGACTCGGAA GCTGGTAGCA GCAGCTCTTC ACATGAACCC ATACGACGTG AGCGTTCCTG TTGTTGGAGG ACGCGGTGGG GTGACGACAT GCCCATTGAT 1700
TGCCCAAACG GGGCTTCGTA TTCCCTTGA GGATATCATT CGCATATCCG GGGAGGTACA GAGCTACGGC GTACCTTTTG AGGTTATAGT GGGTACTGGC 1800
1900
```

TTACACGACT TACTGAGCAC GGAAGCTGCA CCGCCGGTGG CCCTCAGCCT TGCTTACGCC ACCTGTGACT TCTCCACGTC GCTACTCAAG GCGCAGCGCG  
2000  
GTGATGTTGG AATCGTCGAG TGGCTCTCG TGGAGTCTAC GATGAGGCC GAGACGTCAT TCTTCAGCTC ACGGGTGGAG TTGGGCCGTG ACGGTGTGCA  
2100  
GCGCATTTTC CCCATGGGGG CGCTGACGAC CTATGAGCAC GAGCTCATCG AGACAGCAGT ACCGCAGTTG GCGAGGGATG TGCAGGCAGG AATCGAGGCT  
2200  
GCTACGAGGT TGTGTGACT GCCCTGGGGT GTGCTGCGGA GGAACGGCG GTGAATGAGA GAAGACGAGG CGGGTTCGGG CCGCGGTTGT GGCCGCCTTA  
2300  
TTCCGTGGTT GTCCTCACCC CTTCTGTTCC CCGTCGAGGC TCACAACGTG TGTGGCATGT GTGCGCCTCT TTGGCTGCAT CGCTTTCTGT TACAAACCTC  
2400  
TCTGTGTACG TACGACCGAA GGCCGCAGGC TCGCTCGTGC TTTTCTGGAG AAATCATTA TGTAAAGGA AGTGCTGGTG CTGAGTGCCC GCGGTTGGCT  
2500  
TTCTGGCAGA CACGGGGCCC CCTACGTTGA CGGACTTCTC TCGACCCCC GCCCCTCTT CCGTGTATGC GTGCGTGCCT CACTCTCTGT GTGCAGTGTG  
2600  
CGGCTTCATA ACGCTGATTT GGTGGAAGGA GGTTCGGCG CTGCTATCGC CACAGCGCA CAAATGAGGG GCACACGCAC GCGCTAGGGG GACATGATGT  
2700  
AGCACAAATG GAATTACGTG CACACGATGC GGCTCAGCAT CCCGCCCTCT CCCTCCCTTT GCCACTCTTC CTTCTTCTCT CTGCTTTCAC CCGCTTCTCT  
2800  
CCGCCTCCAC CAGCTTCGAG AACATTACTG ACAACACAGC TCACAACCGC AACTACGAAA TCACCGCCTC GCCCTGTAAG ATCTACCTCG TCTCCCTAAT  
2900  
CCGCACGCAT ACGCTTCTT TCCCACCCT TTTGTAATC ATCAGAATGC GCTGCTCTCG GCGTACTTC TCCCGTGTG CCGTGCTCGG TGCTGCAGGT  
3000  
GGCATTGGCC AGCCGCTGGC CCTCCTCCTC AAGAATAACG CGCACGTGAA GGAGCTGAAG CTGTACGACA TCAAAGGGG CCCGGGTGTG GCTGCCGACC  
3100  
TCTCCCATAT TTGCTCGTCA GCGAAAGTGA CTGGGTACTC GCAGGAGGAG CTCAATAAGG CTGTCCAGAA CACTGACCTC GTGTTGATCC CTGCCGGTGT  
3200  
GCCACGAAA CCTGGGATGA CACGCGACGA CCTCTTCAAC ACGAACGCTG GCATCGTGCG CGATCTCGTG ACGGCGGTTG CCAGGGCCGC ACCGAAGGCC  
3300  
ATCATCGGTG TCATCAGCAA CCCCCTCAAC AGCACTGTGC CGGTGGCTGC GGAGACGCTG AAGAAGCTCG GCGCGTACGA TCCTGGGCGC CTATTTGGCG  
3400  
TACCACACT CGACGTTGTC CGTGCTCGTA CCTTCGTTGC GGAGGCGCTC GGTAGAAGTC CGTACGACAT CGACGTCCCT GTCGTTGGCG GCCACAGCGG  
3500  
TGAGACGATT GTGCCGCTGC TCTCAGGCTT CCCGTCCTG TCGAAGGAGC AGGTGGAGCA GCTGACGTAC CGCATCCAGT TTGGTGGGGA TGAGGTGGTG  
3600  
AAGGCGAAAA GTGGAGCTGG CTCGGCGACG CTGTCCATGG CGCACGCGGG AAACGAATGG GCTACGGCGG TGCTGCGCGC CCTCAGCGGT GAGAAGGGTG  
3700  
TCACAGTGTG CACGTATGTG GAGAGCAGTG TGGAGCCGTC ATGTACCTTC TTTAGCTCCC CGGTGGAGCT GGGCAAGAAT GGTGTGGAGA AAATTCATTG  
3800  
TGTGCCAAG CTGAACGCAT ACGAGGAAAA ACTGATGGCC AAGTGCTTGG AGGGTCTGCA GGGCAACATC AAAAAGGGAG TCGCTTTTGG CTGCAAGTAA  
3900  
GCTCGATTTC TGCTTCGTAC CCAGCGAACA GTATGGCAAC GTCATGCAGA CACACAACCTG CAGTATTGTG AGGATGTCTG CCGTTATCGT GAGTAGAGCC

CAGCAGCGAA TCGACCAAGT GATGTGACTT TGTCAGTGAC GCCCTTTCTA TCCTGTGATT CTCCCGCTCC TCGCCGGGCC GTGCTGCTGC CCTCGCCTCT 4000  
 GACGCCTCCT CGCGCGTCGA CGCCCCCGT CTTTCCCTTCT CGTCCCCCTG ATTGACGCCC ATCAGCTATT TTCGCAACAG TGACGACCTC GAGTGCACCTC 4100  
 CGTGCGCTGC TTCTCGCCC CTTCTTATTG CTTCTCCCTC CAAGCGCGGC GTAGTACCTT TTCGCACCTC TATGTGTGTG TCCATGGATG CATGCATGGG 4200  
 TACATGTGTG GGCGGTGCAG ACCTCACTCC TCTGTGCTAT GTCCGTGTGT GTGTGCGTGT GTGGTGCTGA ACTCCCCTGC CGCTGCCTTG GCGGCCCTC 4300  
 GCGTGGCTCG CTCTCTGGCG CCTTCCCCCT GAATATCTTT TGCAATTTTG TGCTTCGCTC TTTCTCTTTT TTTTTTTGAG TTTGCACACG CGCCTCCGTC 4400  
 TTTTTCAGGT GGCTGTGTGG CTTATCTGGG TCGACGAAAG CGATCACAGT GGCGACGGAA GGCAGTGATG CAGAGAGAAG CACAGCCATG TGGGAGTTGG 4500  
 AGCTTACCCT ACTCCCCGC CACAGGAAGA GCGTCAGCGC GGAGGAAAAG GGGTATTGGT GCAAGCTAGA GCTGTGCTGT GCCCAATGTG TGCGTGCTGA 4600  
 GGGATGAAGG GGAAGTGATC GATACACACA TATCACAACG TGGGAGTGAG GGTGACTTTC CTCCCTCCCT CGCCTTTTCA GCGCTTGCGG TGGTGTTCCTC 4700  
 AGACACACAC ACACACACAC ACACACACAC ACACGTCTCG CACCTATGCG GTGCTTAGCG AAGTGCTGTC TCTCATCCCG GCATGCTGCA CGTGGACAGA 4800  
 GAGCGACATC AATGATGAAG GGGAGCGCAC ATGTGTTTGC TGCTGCGTTT TCTGTGTCAC CAAGTAAACG ACGTGCTCCG GTGCTCGTGC AAGTCTCTAC 4900  
 TCCCAACTCT AGCACAGCTC TGTACTGTAT CCTCGTTCAC TTGGGCCAGT GTGCCTCAGT GCCAAATCGG CTGCAGGTGC CACGACAACG CTGCAAGGCG 5000  
 GGTTTCCCCT TCTTTGCCCTT GTTCTCTTTC TTTCCCTCAT GCTTCCTTTT TCGTGCGTGC ACCTCCCCCC CGACTGTATC GCCAGTCCC ATTCACTCAC 5100  
 CCCTCCCAGT CTCTTCATCT CGCATTTACT CCCTGGCCGA CTCGTTTTAA GACGCTTCTG CTTTTGCGTG TCGGTGTGCG TGTGTGTGTT TGGGGTTGCG 5200  
 TAGGCTCGCG TGCACGTCTG TGGACTTTC CCCCCGCCCC TTTCTCTTTT TTCCCCTCTC TCATGGTTCT TCGCTCTCTC TCTCTATAAG GAGCGCGAAA 5300  
 AGAGGGATGG GCGGATCAGC AGTGACTTGT GTGACGTGCG GCACCAAGAC TGCCTCGTGT GCCTTTTCAC TCGCTGCGGA ATAGCCTTTC TCTCTCGCCC 5400  
 TTCCTCTTGA AGGCTCTTCC GCGGTTTGT CTTCCATCGT CCTCTCGACC GCCGCTCTT CTCTCTGTTT CGTCTCGAAC TTACTIONGCA ACGTATCTCG 5500  
 GTAGTGTTTT CCACCAGTAT TTCTCGCTTT GTATGTATTC GCTCTTGCGC TTTTTTTTTT GTTCTCCTGT TTGTCAGCTT CTTTTGTGGC ATGATGAAAT 5600  
 GCCCTTCTCT TTCCCGATGA CCTCCACCGC TGCACAGCTT CGGGCCCCCA GTCCTCAGTA CCCTTACTCT TCACGCCGCT TATCTGTACG CCTCTCTGCA 5700  
 GGTGCGTCTG ATTGAATGGT GGTGAACACA CGTATTAAGG GGCCGTAGTG AGCATGCATC GCATGACGTC TTACGCTTTT TCTTTTCCTT GTTTATCTGG 5800  
 GGAGCTTGAG GTGTTTTCTA CGATTTAGCA CGGATGAGGT GTCAGTGCGC GCGCGCCTTG TCCTCTGGAG TGCCGATCGC GTAGTGAGGA GTGGAGAGCA 5900  
 6000

CTCCGACAAG AAAAGGATAA TGATACATCA TTGCACGCGA GCAAAGAAGG GATGTACGTC CTCCCCTCCC CCAGCTGCTG GACACTCGTA CTCTTTTCTA  
6100  
CGTGTGCCGA TCGTGTTAAC CTGGGTGGTT GTGTGCCCCC TGTGTGCTGG TTATCAGCGC CGCTCGCGTG TGCTATTAC TGCTGCTTCT TATGTGAAC  
6200  
CGCTGGCATC ACGTGCCACT CTCGATGTCG CGTGAGCAGC GAGGCTTGAG TACAGAGCCC AGTCGAGGGT CTCAGGACGG AGGTCTCTTG AGGGGTCTAT  
6300  
GCGCGGCTTT ACGTGAAAAC AGTGTCCGCG CCCGCGCCCC CACCGCCATC GGCTGTGCGA CAACCGAGTC GGCTCTCTCC CCCTCTCGCC TCTCGCCTCT  
6400  
ATCTCTTCTG CTCTTTTTTT TTCTTTTTCGG CCTGCTAAGT TGTACGCCTT TGTGGAGGA AAGCGAGTGT GCTTTGTGTT TCTTGTGTTT CCTCGCTCTC  
6500  
TCTTCTCGGC TCTAGCCGTC ACCACGTTCC CCTTGCACCG CATCGCTGCA GGCCATGAAA CAATCGATCT TAAGTCGCTT CAAAGTCGCC GTCTTGGGGC  
6600  
CCAGCGGGGC CATCGGCCAG CCGCTCTCTA TGGCTCTCGT GCAGAACAAG CGAGTCAGTG ATCTAGCCCT CTACGATATT GTGCAGCCGC GCGGCATCGC  
6700  
CGTCGATCTC TCTCATTTTC CGCGCAAGGT CAAGATAGCG GGGTACCCGA CAAAGTGGAT TCACAAGGCC CTAGATGGGG CAGATGTCGT CCTGATGCCG  
6800  
GCTGGCATGC CACGCCGGCC TGAATGACC CACGATGACC TCTTCAACAC AAATGCTCTC ACTGTGCACG AGCTGAGCGC GGCGGTGGCG AGGTACTCCC  
6900  
CCAAGGCTAT CTTGGCCATT ATTAGCAATC CATTGAACAG CTTGGTGCCC GTCGCGGCAG AGACGCTGCG GAGGGCTGGG GTGTACGACC CTCGCAAAGT  
7000  
GTTTGGCCTA ATCACGTTGA ACATGATGCG GGC GCGCAAG ATGCTGGGCG ACTTCGCTGG CCTGGACCCG GAGACGCTGG ACGTGCCCGT CATTGGAGGG  
7100  
CACAGCGGGC AGACCATAGT TCCTCTTTTC TCCCAGTCTG GCGTGGCGTT GACGCGGGAG CAGGCCGAGT ACCTCACACA TCGGGTGCCT GTGGGTGGTG  
7200  
ACGAGGTGGT GAGGGCAAAG GAGGGTCATG GGTCTTCATC GTTGTGATG GCACTTGCGG CTGCGGAGTG GACAGAAGGG GTGCTGCGTG CGATGGATGG  
7300  
CGAGAAAAAT TTATTGCGCT GCTCCTTTGT CGAAAGCCCA CTGTTTGCGG ATAAGTGCCG CTTCTTCGGC AGCACCGTAG AGGTGGGTAA GGAGGGAGTT  
7400  
GAGCGGGTGC TGCCGCTGCC CCCCCTGGAC GAGTATGAGG AGGAGCAGCT GGACCGCTGC CTACCGGACC TGGAGAAGAA CATCCGTAAG GGCTTGCTTT  
7500  
TCGTGGCGGA AAACCTCGTCC ACCATAACGA CCTCGTCCAC TTTGCCTTAA AAGAGTTGGC GGTGCCCAT GGAGCACTTG ATGCAGCATG AACACCCGCC  
7600  
ACATTGTCCT CTCTCTCTAC GCCTCCCTTT GTTCTCCACA ACTCTCCGTC GATGCTACGG CGTGATGGTA GTGGTGTCGC TTCTCTCCAC CCATTCCTC  
7700  
GTCAGACCTC ATCGCTGTAT GGGGGAGATG GATGGTGAG ATACCTCTCT GGGTGTGGGT CTGTTTGTCT TCTCACATCG CTGCTTTTAC GTCTCGAAGC  
7800  
CTATGTATGC TTTCACCTC AGGCGCCGCT GTCTTCTTCT GCTTCGTCTC TGCTGGTGCG CTTTGCTGTC ATTTCCCTCG CTACACCTGA TGTCTCTTCT  
7900  
GCTTTCCTTT TCTCGTTTTT TTTTTTCCGT GCCGCTTGTC CTCTTCCAAG ACACCTCATT CTTACTTTCA TCAATATCGC CAGCTCACGC CATGGGCCAC  
8000  
CCCCGTAGG AGAACAAAGC TGGAGGAGCA AGTGTGCTTG TGTCTGTGTG TCTGTTTGCC CTCGATCTCT TTCCTGCTC CACCAGCCAC ACCTTCTACC



CAATCTCTGC CGTAACGTAC CCCACCCACC TCTGCCTATT CTCTGCCTCG ATTTCTCACT CTCAAGAGAT ACGAGCACTC ACACATTAC CCTGGTGTG  
10200  
GCAGAGGTAG TCATACTGGA TCGGGAGGGG GGGGGGACTA CAGTCGCTCT ACGCGAAGCG TGGCGTGCAT GCACGATAGC TTTCGGTGCC GCTGCTCATC  
10300  
TCTCACAAGT ACGCGTACAC TACCTTTGCC GGTGAGAGGA CTCTGTGCA CTAGTACCGT CAAGTATCGC CTCTTCGCCG ACAGTCATGC GCTCCTCTGC  
10400  
GACTCTGCTG TCCCAGGTTG CCGTCTTGGG TGCAGCTGGC GGCATTGGGC AGCCCTTGTC GCTCCTCCCT GAAGTGCAGC CCTCTAGTGA CAGACCTTTC  
10500  
GCTCTACGAC ATTCGCGGCG GAACAGGCGT GGCTGCCGAC CTCTTCCATA TTCCGTCACC AGCAGAGGTC ACTGGATTTG CCTCCGATGA ACTGGAAAAG  
10600  
GCTGTGAAGG GGCAGACTT GGTGCTTGTG GCGGCTGGCA TCCCACGCAA ACCTGGGATG ACACGCGACG ACCTCTTCAA CACGAACGCT GGCATCGTGC  
10700  
GCGATCTCGT GACGGCGGTT GCCAGGGCCG CACCGAAGGC CATCATCGGT GTCATCAGCA ACCCCGTCAA CAGCACTGTG CCGGTGGCTG CGGAGACGCT  
10800  
GAAGAAGCTC GGCAGTACG ATCCTGGGCG CCTATTTGGC GTCACCACAC TCGACGTTGT CCGTGCTCGT ACCTTCGTTG CGGAGGCGCT CGGTAGAAGT  
10900  
CCGTACGACA TCGACGTCCC TGTCGTTGGC GGCCACAGCG GTGAGACGAT TGTGCCGCTG CTCTCAGGCT TCCCGTCACT GTCGAAGGAG CAGGTGGAGC  
11000  
AGCTGACGTA CCGCATCCAG TTTGGTGGGG ATGAGGTGGT GAAGGCAAAG GCGGGAAAGG GCTCGGCGAC GCTGTCCATG GCGTATGCGG CCTCGGATTG  
11100  
GTCCACCTCG ATACTGAAGG CTCTCCGCGG TGACAAGGGC ATTGCCGAGT ATGCCCTCGT TGAAAACGAC CTCCAGCAGC CACACTGTCA CTCTTTTGG  
11200  
TGCGCAGTGG AGCTGGGCAC GCATGGTGTG GAGCGTGTGC TGCCGATACC GGCCTGAAC GCCTACGAGC AGCAGTTGCT TGACGCGTGC GTTCCTGCAC  
11300  
TCAGTGCTGA GCTTCGCAAG GGGTCGACTT TGCTGTGAAG ACGCACCTCA CTCCAGATTG CTGAGCAGCT AAAAACTACC CCCACAGACG CCGCCTTGCG  
11400  
TTGTTCTGTT TTGTTTGGTT TTCTCATGCT CACAGTTTCT GGTGTTTTCG CTTTGCCTGT TCTGACTTGC ACTGTGGTGG TGAGGAGGAT AAGGAGGTGC  
11500  
AGAGATGGGG GTGCGGTGCT TGTCAGCCCC CTCCCCATCT CGTTTGCTCT CATCTCACCC ACCTTCCTCA ATGCAATCAC ACTGACGTAT ACGACGGTAG  
11600  
GAGTGTTCCT AAGATGGGTG AGTGATGATG AATCGGGCTT CGCCTACCTT CTTCCCTCCTC TTCTGCAGTT GGTAAGAAAC AACAAACGGAA CCCTCGCCGA  
11700  
AGGGAGCAAC CGCTGAATCA TACTGCTGCA TCCCCAACAG TGGACGATCT CACGCCATCG TGGGCGCTAC GTTGGCACTC CTCACACAGG CCGGGCCGGG  
11800  
TCCTGATGGA GTCCTAATGT GAAAACCTTAT TCGCATCCCA CCTGGACATG GGTTTGCCTT TCCAAATCAC AGCTACGTTT ACTCTGCTGT TCACCGAGTT  
11900  
TGATGAGAAC TTTGTGTCTT TCGATCAGCA CCGTATTACA GAAGACTCGT GGGGGTACCC CATGAGAGGC CCCGCTCGGT GGGGTTGTCC CACTTCCACC  
12000  
CAACGCAGCC ATCACACAAC TCTTGCCTAA TGAAGTACGC CTCCCGGACG CGTGCATTGT GCAGCTCGAG CATGACGAGG ACTGAAGGCG CCTTCAGAGA  
12100  
CTTCTCGGCC TGGTGGGCGT TTAAAAGGTC GAGCGAAGAG GGCCGCCTCT TCTCTTCGAC GAGCCGGAGC TCGAGCTCAA GCACACCGAG GGGCGACCTG





GCGCCATTAG CTGAGGTTGT TGGTGGTGAC AGCTGTGAGG GGCCGCGAAG CGGAGTGGCT TCGAAGTCTT ATTTGCGCGC TCCATGCGAA GAAACGCAAG  
14300  
AGGTGCGAGC TTGCCGATGA GCTGGAGCAT GTGAGGCAAG CTGCTCTGGG TTTCCAGTGA CAAGAGTGCC GCGGGAACAG TGAAGTTGGA AGCTCGTCAA  
14400  
CCTGTGCGGT GCGGTGCTCC GAAGTGTCTC TTGACTGAAA GGCCTACTCG ACACGAGCTG TAAAGAGGGA GCCCGGCTTT GCCACGGCCC TCAGCAGCGA  
14500  
CTTCACAGAG AGCGAAAGTG AGGGAGGCGA CGCGATCTCT GTCTCAGCTG GCCCACCTTA CGCAAAACCT CTTCGACGAC GGCAGCAGGT CGAGAAGTGT  
14600  
ACCCGCGCAA ACTACTGCAG CAGCTAACGC GTCGGACTGA GCGGTACCGC CGTCTTCGCC ACTTGCGTCC ACCACGAAGG TTCCATGCGC CCTGTGCTCC  
14700  
AGTAAATTGC TGGATGACCT GTTCGCCGAG CGACGTAAAT TTCACCCATA CCCACAAGCA CACAGGCACA TATGCCACG CACGTTTTCA CGGCACAAAG  
14800  
CCATAGCTCT CTGTGTGCAA GTTGCCCGTC GTGCGTTAGC ACACCTGGTG TCCAGCTGGC ACATGATCGC CGAAAAGTCT TCTCTGGATA CGTTGAGTCG  
14900  
CTGTTGCTTT TCTTCCGCAA GGAGGCCTCC CCTCTCTCTT TTCAGGCTCA CCCGAGGGGT CACGGTGATA TGCACGGCGC ACATCGTGGT GCATTAGTCA  
15000  
TGCACGCGAG CACTTTTCTC TGCCCTGCA CGACTCCCGC TCCTGCTGTG ACACCATGTC GGTGAGGGTG AGATTTGATT TTGCACCGGC TGCTGACGCC  
15100  
TCTCTCCCTT TCTCTCCACC CCTGTGCTCT ATACGTAGTG CTCGCTGCCG CCATGGAGAC AGGCAAAGGC ATGCGAAAGG GGGGAGGGCT AGCGGGGTAG  
15200  
AGGCACGGCT GCTGCCGAAG ATGATACGAA TGTTAACTCC TGCTCTTCTG CTCTCGTGCG TCTTTCATCT ATTTACTCGA CGAGATGTGC GTCCGTGACC  
15300  
CCTGCGTACA TACACCCAAG GCACAGCAAC CACGTGCATT ATTCCTGCCC TTCTCTCTCG GGCACGTCCG CACACTTCAG TGCTGTTTTA CAGCCTTCTC  
15400  
TCCCCCTTC CTTTCATCGT AACTACTGTG CAGAGGCGGC CATGGTGAAG TATGTAGACG CCAGCGCCGA CGTCGCCGC GCGGCAACA AGAAGATACG  
15500  
CAAAGGCTTC AAGTCGGACC GCTTAGAGAA CTACAAACGC ATGCTGGTCA AGAAGAACGG CAAGGCGGTC AAGGATGTCC CGACACGCAC GGTGCGACCC  
15600  
AAGACGCTCA CATTGACGA CTCTCGCGC CGGGACTACT TACTCACGCT GCACAAGAAG AAGAACGAGC GACGGGTGCA GGCCTTTGTG GATGCGAAGC  
15700  
GCAAGCAGCG CAAGGACAGC GCCAAGACAC GCGGAGAGCA GCGCGAGGAG GCGCGACGGG CGTACAACAA CTACGCGCGT GTGCCGATTT TACCTGATTA  
15800  
CACGTATCGC CTGCCAAGC TCCAGGACGA CCGGTTTGCC GACGACGACG AGGCCGAGGA TAGAGGAGGG GAGAGCGACT CCAACACCCA GGGCAAGGAA  
15900  
ATGAGGGAGG AGGACGCTGA CATGTCATGG ATGAGCGTCG ACGATCCTGA GGTGGCGGCC GACGTCGCCA ACGAGAAGTT GCGGACCGAG GCATCACAGA  
16000  
GGCGTCGCCG CGCGAAACGA CTGGCTACTC TTCCGCACAG CACGCACACG ATGCCTGACA CCATGATGAA CCAAGAGGTC AGTGTCGCTG CTGACACGCA  
16100  
CTGCTCCGTC GGTCCGTCCT CCTCAGGCGA GGTGGACAGC GAGTACGTGA CGGTTGAGGT GAAACCGCTC TTCAGCCCCT CCAGCGGTGG CGCAACGAGC  
16200  
ACCGGCAAAG ACGGCGCTGC GTCTGCAAAG ACGTTGCCCT CCACCAACTT CGATGACCTC CCGTTTACTG TGCAGCAGGA ACTTCGCCGC CTGCGGCAAG

16300  
 AGGTGAAGGG CCCCGGAGA ACGAAGCCTC GGCTGCGCAT GATGAAGGAG CTGGAGAAAA TCCGCAAGAT CCGCAAGCAC TCACGCAAGG GCCACGGCAA  
 16400  
 GCGTAAGGCC TCTGGCAAGC GCAAGAATCG AAAAAAGTAA GCAACGGACT GGCAGCACGA GGGCGGGGTG TGCGCCACCA TGAGGGTCCC TCGCACTTCC  
 16500  
 CCTACTTCCG AGGCACCACC TCTCTGTAGA GTGATTTCATC TACCCTTCGT TATTTTGCCA TTTGCCGCTG CTTACTACGTG GCTGCGCGGC TTCGACTTCC  
 16600  
 CGTGGGAGGA TGTGTGTATT GGCTTTAATT CACGAATAAT CGGAGCTCCG GCGGCGGACA CATCGGAAAG AGCGAAGTCC AGGGATGTCT TTGTGTCTTT  
 16700  
 TCCTTCGTGC TGCTCCGTGC CTCTTTCTGC GACTCTATCT CTCTCTCTTG CATTGGTTGT GATGTAGTGA CAGCCGACAA GAGAAAAGGG TGTGTGCGGT  
 16800  
 CTTGAGGAAA ATGGTTTGCT TGCGTGCGCG TAGGTGTGCC TCGTCTTTCA GATTACTCGT TGTTTGAACA GGGGAGAGGC AGGTGAGCGA TCGGCGGAG  
 16900  
 AGGAGGGGTC TGCTGCCTCT TGCGTCAGAG GCCATGCCTT CTCCTTCCTC TCACTCCTCC TCGTCTATG ATGAGGGCTC CTATGCACGA CTGAGGCCTG  
 17000  
 GCTAGCAGGT CGGTGTCTTG TGCCCGTGTG CTCACTCACT TAGCCTCTCA CGCTTTTCTT CCGTCTTCTT GCACACACGT TTTTTTTTATT ACGCTTCTTT  
 17100  
 CCGACGCGCC GCGCGCAGCT CCTCCCCGCC TATTTTTTCGT GATAAGCTGA CAGCAGTGTG GTGCCGTCCA CTTCTCTCCAC TCGCGCTCTT TACGTCGTCG  
 17200  
 TTTGCTTAAT TAAGTGTAC TGCTTCCCGC CTTCTTCTGC TGTTTTGTCT GTTGTGTCG TCACAAGCGG ACTCGGAGCA CCATATTCTC CGTCATTACA  
 17300  
 CGCACTCATC TTCCGAAGGG TGTGGCGCCA TGTCGTCGGT GACCATTGGC GAGCGACAAA AGAAACGTCC CAGTAGCTCG TGTAGTTCCT TCGACTCGAA  
 17400  
 GCCCATTAT CGGACACACC CACCACGCCA CCTGCAGCAC CTGGAAGCTG ATAAGGCACC GCAATTTATG CCGAACAGTC CCACTGATTG GTCCCCCCCG  
 17500  
 ACGTCGCCAA AGTGCCTGT GCCACGCACG CATAACATGT CGCCCGCAA CAGCACCATG CCATCCAGCA AGCTTCCTTT CAGCAACAGT GTAACGGAA  
 17600  
 CTGGCGCAGT GTCATAGGA CCTCTTGCAT CTTTCGACTC TGAGACACAA CGAGGCATGC TGGCCACCGC TGCTGAGTGT TGTCTGAGA GCTGCAGCAG  
 17700  
 CGGCCTCTCG CGTGCTGCGG TGCTGCTGAG CAACCACGGT GTCGCATCTC CACTCGTTAC CCCGCGACAG CCCCCCTCGA TCTTGGCGGC TTTCTGCCCC  
 17800  
 CTTACTTCAG AGGCTTGGCA GTCGGGTACC ATGCGCGACG GCATTGCAGT CGACGCGAAC ACGATGTCTA CATGTAGTCG CACCGACTCG CGTACAGGTC  
 17900  
 TGCAATCATC ACTCTTCTTT TCACCTGGTT GGCCGCAGTC GAGCAGGTTG GCAGCGGCAC AGAGCGCACT GACCTCCCTC ATGGGTACGC CGGGCCAATT  
 18000  
 CTCCACCAAT ACCGCGGCTG AGGGCGACGA GACGGAGGCC ACAGCGCGCA AAACCGCCG GTTCTCCGCC AACCGCTCCG TGAGTCGTAT GTCTTCACCC  
 18100  
 GTGGATTTTA TGCCGGTCTA CCCTATGCGG CCGCCGGAGC CTTTTGTGAT GGACTTCAGC AGCCCTCTCG TCCCCGAAGT CTCTTTTTTG ACGTCACCAA  
 18200  
 ACGTCTGGAG CACCGCGGGC AGAGACCGCG AAGGGATTTCG GCGCCACGCC AGCGCCGTCC TCATGTCTGC CGTCGGAGCC ATTGAGCAG CAGTCGCTCT  
 18300

TGCGGTCCCC GCTACTTTAC TCCTTGATAC CGCCGTCCAT CCCACCCAGC GCATCTCTCT CATCTGAGTT CGGCTGCATT GGGGAATCCA AGCAGACGCA  
18400  
GAACCGACTC TCGCGCCATC GTTCAGCTGC TTCAGCTGAG CCAGACGATC TTCTTTTGAG GCTGGGCAAC AACTTTCGAG TGC GCGGGGC CGCAAATGCG  
18500  
TCGCCGCTGC CTGCTGCTCT GCCTTCCGTG AAGAGCAAAC GTAAAAAGCG CGACCATCTT TTCACCTCAC CCACGCGGCG CAGCTTTCGC AGCCCATTGA  
18600  
TCAACTCGAA TGAGGCGTCT CTCTCGTCGT TTTTCGTTGC GCAGGATGCG GAGGCACACA GTACCATTGC GGTTGGCAAG GTGAGCGACG AAGAAGACGC  
18700  
AGCACATCGA ACCACCAGTG CCAATGCCCA CCGCTCGGGC CTCCCCGAGG ACGTGAAGG AGAAGAAGGC GTTACCGCCA CCGCGCCTGC TACTACCACT  
18800  
GATGACACAT TCGAAGACTT GTGGGGTATT TTACCTGCAG CCCGGTGTGG CGGCGGCGCA ACAGAGACGC CGTCTCACAT CACTACATCA TCAGCGCCGT  
18900  
TCGAAAACCGC GCCTGCGTTC CGTTGCGTCA CTGCATTGCG GTCAGAGACA CATGAGACAG ACGACCAGT TAGTGAAGAG TTGAACCAGC CCAGCCATTT  
19000  
CTCGTGTGCT GTCATTGAGA AGCAGCGCAA TGTGATGGTG CACCAATCTT CAGCAGGACA ACAGCGCAAC TCAGTCAATA AATTCACCAA TCCCCAACGT  
19100  
ACAGTGAGCA AGGGGCTGAC GCCGCAGCAG CTCCAGCGGC GTTTTTCTCT GCCCCAGGAT GACGCTATTG AAGTCAAGCG AAGGAGTTGC CCTTGAATTC  
19200  
ATCTTTACTC GCCGCGCATG ATTTGCTCTC TCCCTCGCTT TGGTTGTCCT GCCCTGGCGT ACTTGAGCGC TTTAGTTTCT CGTTTTTCTC GCATTCGCGC  
19300  
TTGTTTTTGC TTCTCCTCTC TTCCCCCTC CCTCCCTCCC CTCGTTTTTT TTTTTTTGCT TGC GCGTGCG CGCGTGCGGG TCGTGTGACC TGTCGCCGAT  
19400  
GTTGAATGAC TCGTTCCTC CCTGCTTATC CTCTTCTTCC CTCAGCTCGG CCCCTCTCTT TCCCGATCTA TCGGTAGGTA CGGTCTGAGG GCTCACGGAC  
19500  
GTATGGGGAC AGCAGCCTGA CAGGCGGACG GTGTTGAGTG TCACGGGTGA TGCTGCTTCC TCCTTTGCTT ATTGCTGTGT ATCCGTGCC TCTTTGGATG  
19600  
GGCTCGTTTT TCCTTCTCTC TTCTTTTTTT TCCCCTGTTT TGTTTTGCGG CTTGTTTTCT CCATCTTGAC CTTGAGGGGA ACTGATGACC CCCCCACCC  
19700  
TTTTTTCTTT CCTTTTCCCC CCCCCCCTT CCCGTCCCCA TCATTTTCTT TAACCCAAAC TTTACCACAC AAAATCCCC CCCCCACTT GATTTCCAAA  
19800  
AAACCAACCC ATTTCTTTAA AAAACCCAAC AACCCCCC CAAAAAAAAA AATAAAACCA AAAAAAAAAA AAAACAACC ACCCTCAAAA AAAACACCAA  
19900  
AAAACACACC AAAAAAAAAA CAAAAACAT CCTCACCCCC CACACTTCCA TCAAACCCTT TCTTCCCCT CCCCCCACT CAAATCTCCC CACCCTTACA  
20000  
TCCTATTTCA ACCTCCACCT ATTCCTTCC TTTTTTTCCA CTTTCACAAA CAAAAATCTA ACTTCCCTTA AAAACACCAA CTCCCTCCTT CCAATAAAAC  
20100  
ATTAAACAAA TTCTAACAAC TCTTTCCCC CCCCAAATC CATAACCTCT CTTCCTTCAT CAACCCAACC TACCAAAATA AAATTTAAAA AATCCACTAA  
20200  
TAAAAATCAC TCTTCTTCTC CCCCTATCCC GTCTGCTCGC GTCTGTGTGT GTGTGTGTGT GTGTGTGTGT GTGTGCCTCC CTTCTCATC ACTGTGTGCG  
20300  
TGTTGGGGTG TCTCACTTCG TTTACCTTCG TTGTCTTTGC GTTTACTTCT CTTCCCTCAT TTTTTACCGC GCGGCGTTTT CTTCTCCCTC TCGCCTTTTA

CGCCTCTTTT GTTTTCTGTT TTTTTTTTCC CCTTTCATTC CTCCTTTTTT TCCAACGCTG TTCATCAATG AAGTACGCAC GCGTGTGTGC CCGTGCTGGC 20400  
 GGTGAGGGGG GCATACGGAG CAACACCCAC TGACCCCTCT TCCTTCCCCC CTCAGACGCA CACACGAACA CAAGCACATA CCAACTACCA CAGCTTGCTA 20500  
 ACGCAGGGGC ACAAGCCGGA TGAAGAAATG AGACCTTGGT TGAGGTGCTG CAGAGGCGCA ATCGCTTCAT CGCACCCGTC TCACGGATTG GACGCTCGCT 20600  
 CACACATGTG CGCCTCTTCC CTCTTCTGT TCTTTTCCCT TTTGTATAAT TTATCCTTTG ACGCTTCTTG GAGCCTTTTT GCAAATGCGT GTGTACTGTT 20700  
 TTGTTGATTG TTTCGTTGCC ATGTTTTTCA GTTTGGTGTC TTGCCTCATC ACCGACGCAT GTTTGCCGGC TGTGTGTGTG TGTGTGTGTG TGTGTGTGTA 20800  
 CGCTGCTGTT GTGTGTGCCT CCTTGTGCT TCGCTCGATG CGTGCATCGC GTGCGTTTTT TCGCTTCTTT GCACTACTTC ACGTACCCCA CGATTTGCC 20900  
 GTATAGGTAA AGAAGTCTTA AACACACGAA AAGCTGAGAA AAAGCGCGGT CAGAGAGGAG ATGCGGTTTG TGGACCTCCT TTGAAAGAGG TAGCGATGGG 21000  
 CTTGGTGAGG GGGGGGGTA GCCACGAAGA TGTACGCGCA GACGTCGTCT GGCCCCAGAA CGTCAGCTTT GCTTCTGTAT GGGGGAGGTG CCTCGTTTTA 21100  
 CGTGGGCAAT TCGGCGTGCT TTTCGCTGAT GTTTACTGCG CTGTTATGTC GTTGACGTTT TTTTTTTCAT GTTTTTTGTT TTTCTCCTCC GCCACTGTCT 21200  
 GCAGCCAGAC GGTTTACAAG CCGAACGCAT CAGCCACCCA TCCATGCAAT CTCGCATTGC TTTGTGGTCC TCGACGCACT TGTTCGACA GTTCCCGCC 21300  
 GTTGCTTTTT CTCTGTGTCG CCACGCTTTG CGTTTGCCCG CTCTCTCTCT CTAGCACGTC GACACTCTCT CGCTAAGGCG CTGCCTCTCT CTAGATCTTT 21400  
 CTTCATCTAC CTACACCCGC GCACACGTCT GAGAAGGCCT TCCTCTCTCC CCACCCACT GTACTCGACC AGTGTGCGTA CGTTTGTGGC GGTGAAGGAG 21500  
 AGGAAGCGTT GATGGCTATG GCTTGGTGTT TCGCTCTGGG TCTTTTTATG TGTGCTTTTC CTCTAAGTAT ATATTTGCC TGAACCTCTT CCCTCGGCAC 21600  
 ACCCTCTGAC TGCACGTTTT GCTGTCTTCC CCCCCCCCC CCCCCTCTGT TGTGTGTTCA CTTCCGATTT TCATGGTCAC ATGCCGGTGT TGCGGTGCTG 21700  
 CGTTGGTGAA GCAGTGATAC TCAAACGACA TTGATGAGGA TGTTGTTCTT CAGAACGGGT TTTGTCAGAA CGACGCTGCC CCTCTCTTCC TCTCTCAATG 21800  
 ACCCGCAGTG CTCTCTGTAC TGCAACGACG AGCTCGGCAC ATGTGGGACG GTGGCACCTT TGCGAAAGGC TCGTCGGCTC AGGGTCTGGG AAAGGAGGAT 21900  
 GTATGCGTGT GTGACGGGAG GGTGTGGGGG GGGGGAGTTG AAGAAGACCT AAAGAGAGGC GGTGCTGCGT GGGGTGTACAT GTACCGTGCG TATGTGCGAA 22000  
 TTTGTCAATC AAAAGGCATC TAACCTCCT TCCCTCCCCT TCTCTATTTT ATTGCCACC CCAAAGAGAA AGCAAATTCG TACAGCACCA AGTTGCGGGA 22100  
 GTGGTGACGT ACACCCAGGC TTTCTTCCAT GGGCTCTGCA CCGCTCGTGG AGTACTCGTC TCCCCCTTC CCCCTTGCC TTCCTCCTCC ACTCCCACC 22200  
 CTCATAGTGC TCCGTGCGTT CTATTCATGC GTCAAGGCAT ACGCTCTCAA CCCTCTCTCG GTTTGCATGT CACCTCTTCG GCCGCCGCA CAGACCACC 22300  
 22400

CACCGTCTCA ACCACTGGCA GGAGGAGTGG CACTGGCTCA CACCATCCTG ACGATCGTGC AAGCGAGTGC CAGCGCGCTC TCTACTGGTG CTCACGTTGA  
22500  
GGTTCATCTT TCGCTTTTTT TTCCTTGCCT CTACTIONGCTAG AGTGACGCGG ACTGCAGCAG CCACACGCCA GCACCAAGCA GAGGAAAGAG AGAGAGTTCT  
22600  
GTCGCCGAG CGCTCGACGC TGACAGCGCT CACAGACGCA TCCACACCCA CGCGCACAGG TATACTCGGT TTGTTAGGTA AGGCGAGAGG AAAATAGAGG  
22700  
AAATGAGGTC TTCGCTATCG CTGAATATTG TGGGAGGGTG CATAACGACGC ACGCCGCTGT CAGTCAGGAG CACGCATGTG ATGCCTCGTC GTCCCTGCGC  
22800  
GTCTACCTCC GCATTTTAC CTCTCTCCGT CACAGTCGCG GACGCGCCAA TTCTGCACCA TAGCGTTGGC TCTGCTCACA TGCATGCCAG CTGCCTCCTG  
22900  
AGACAGCTCT TGAGCAATCG GATACCATGT TCTCTGGAAG CGTTTTGTATC GTTGACAGAG GAGTGGTGGG GGCTAGTTGA TCGGCTGGTG CAAGTGCCGG  
23000  
TGGTCGCTTC CGATGTGGGC CAGCTGCTGG TGGAGACCAC GCACGCCGAA GAGTTTCAGC GTGATCATAG CCGGGCGGAG CTCGAAGAAA AGGTCATTGC  
23100  
GCAATGGGAA GAATGGGTCT GGTCTAGTGT CCTCGCACGG TACCCACCCC TGCCGCACTT GAGGCCGCTC GAAGTGACGA TACTCCGCC CTTTCCCCTA  
23200  
CCGACATCCT CTCCTTACG CAGTTTGGCG ATCTTCTGTA CTCTTACGAC CGTTATCGCC GGGGCGTTCG CTGGGGTGCG TCCCGCAACG GTGGCGACTG  
23300  
GGTGTGCGAG GGAGGCGCTG CCGCCGCCGC TGCCTACTAC CGCCGGCGCT ACTTCTCCA CCCGTGGCAC GGTATGCACT GCCCTGTCCG CACGGCCAG  
23400  
CAGATGCCTT ACGTGCATCT TCTTCAGTGG ATGTTGGCGC GGAAGGGAAG CAGTGGAGAG GCGTCGCCAG CCGCGCGGA GCTGTGGGAG CGTTACCGCG  
23500  
CCATTGAACC TTTTCAGCA TCCTCGTCTT CTTTCAAAGC CCTCGATGTG TGCTGCCAGA GCGGCTATGT GTTGGACTTG CTCATCCCGC CTGGGGCCGG  
23600  
CGTCGTGGTG GCAGTCGACG CCGACCCTGC TGCACTCGCC AACACAGAAT CTACCTATCA TGAATATATC CGTGAAGGTG GAGGGAGACG CCGGAATGCC  
23700  
GTGCTGTACA CTCGCCGCTG TGAAGGGCTA CCTCTCCCAA CAGCGATGCG GCGGGCAAT AGCAGCAGCA ACACCCGTC CATACCACAG AGAGGTGGTG  
23800  
CCGGTGCTAA CGTTGGAGCT GAAGTGCAGT CGACGAGCGC ATCGGCGGCT GAGCGTCGGC GCCGGCGGGC CAGAGAAGAG GGACGCGGCT ATAGCGGAGT  
23900  
GACGTGGCTC AAAGAGGAGG GATCTTCTC CGGCGTCGAG AGCGCTGACG CGGCGGCTGC CACTGGTCCG TTCGATGTGC TGTACATTCA TCCCCCTACC  
24000  
GCAGTATCCA CCTGGCCGGT CGTAGCGGCG GAGCAGTTTA ACCTGCGCAA AACGATGTGG TGGCACAGGC TGACTIONACAG TGCCGACGCT GAGGGGCTGG  
24100  
ACGCGGGCCT TCTGCTTCCG TATCTCCCGT GTTCGGCGGC ACCAGCACTC ACACGCCACA ACCCTCTCGC CACGCGCTCC GGCCTTGAGC GGGCACTTGA  
24200  
CGCGCTTCGT GCGGATGTGA CGGGGCGCAG CACTGCTCCG TCTCCGTCTG GTGACGAGGC ACCGCGTGGC GCGGCCCTCC TCACCGATGA AGGGTACGTA  
24300  
ATGTTGTTTC TGCCTCGAAC ACACGGCACT GACCTCCTGC GCCGAGAGAT GCCCGGAGAA TGTTCGTTGG CCGACTGGGT GGTGGCGCAG CTGGACGGTT  
24400  
ACTACGATCT GATTCTCCGC CGGCGCTGCG GCACGTACGC TTCCCCCTCG ACGAGCAACA CCGCGCAGTC GTCGAAAGCG ATGGAGAGCA CGCTGCTGGG



CGACAAGGTG TACAAGTGCT TCAAGAACGA GGGCAACGGT CTGCTCTTTC GCCTTGTGGA CGAAAAGGAG GGTAAGTGGT ACTACTACAA CGACACACGC  
26600  
GAGTTCCGCA TGACAGCCAC GGTCAACTTC CCCAACGAGG ACGATGTGAA GCCGCTCGGC AACACGGAGA CGGTGCCGGT CCAGGACGAC GACAGCGCGG  
26700  
TGGTCTACCA AATCACGGTG GATCCAGGCA AGGCGGAGCC GTTCATTGAG GGAAGACCCA CCTCCTACCA CCAAGCATT C AACGCGGACC CGATCGACGA  
26800  
GAGCTGCGTG AACCCGAAGG AAGCGCAGTA CGTCAACAGC GAGCCGGACA GCAGCATCAT CGACGTTAGT CAGTGTAAGG TGTTTAAATG CTTCAAGGAA  
26900  
AACGGCAACG GACTACTTTT CCGCCTCGTG GACGAGAAGG CCGGTCGCTG GCGTTCCTAC AACGATACAC AGGAGTACGT GATGAAGCCC AAGGTGCGCT  
27000  
TCTTTGGCGG AGCGCTCGTG GTGCCCGGAC CGGATGCGCA TATGGCGCCC GACCCAGAGG AGGAGGATAC GACTGTGGTC ACTATCGAGG TTCCCCCGTG  
27100  
CGAGACACGC CTGTTTCATCG AGGGCCGCC TGC AAAGTAC GAGGTCTCTG TGGTCGCCGA CAGCATCCAC AAGAGCGTGC CGGAGGACAG CCCGGAGTTC  
27200  
GCTCATGGTG AGCCAGACCG CAAAGTGATG AACTATGACG CTGTCTATCA ATGCTTCAAG GACAAGCCGG ATGCCCGCT CTTCCGCATC GTTGATTCCA  
27300  
GCCGCCAGCA ATGGGGCTTC TACAATGACA CGACAGATGT TTTCTTCACC GCTCGTTCA CCTTCGACGC CGAGGGTAAG GTCCGCACCT TGGGAGACAC  
27400  
GGAGAAGGAG CAGAACAGTG ACAACGAGAC CCAGTACGTT GTCTCCATTC CACCTCTGAC GACGGTGGAG TTCGTGCAGG GTGACGTGAG GGGCTTCAAG  
27500  
TCGCAGTTCA CAGGCAAGCG TAAGGTGTCC TTGCAGGCAT CTGCGTAGGG ACGTGCACTT GCCATTCAGG CAAACTCATG TACAGCACAT CCTGTTGTCC  
27600  
TCTCCGCCTC CAATACACGT GAGGGAAGAG GCGCAGTCG CGGTGTGTGA TGGATAGTGA GTGAGCGTTG GTGAAAAGAA GAGTGTAAGA GAGGAGGGTG  
27700  
AGCAGGCGAT GGGGGGGGG CGGCGTATAG GTCATGGATG TGGCGTTTCT CCCACATCTC TGGCCTCAGC TTTTTTCCCG TCAAGCCTTT CCTCTCTCAC  
27800  
ACTCCCTGCC GCGCTGACAC ATGCCCATGT GCACGTGTGT TGCTCCTTCC ACTTCCGCTT TGTTCCTTGT TCAGCCCTTC ACTCTGCCTT CGGTGCTCTT  
27900  
GTTATCGCGC CTTAGCTGAC AGACCTGTGC ATTCGCCCTT CCTTCTCTG TGC GAATTCG ACGAGGTCTC TAGCGAGCCA ACAGAACAAA GACTCCACGT  
28000  
GCGAACAAA TGCGCAGAGG AACACCCACG CGTTTTCTCA TGAACGCGGT CAGTGTGGAG GTGAAACGCG GCATGACAGG AGCTCGACGG CGAGAAAGCG  
28100  
TGTTGCTGTG ACAGTGC GTA GGCCTTTTGA AATCGATGCC TGCAGACTTG GAGCTTACT TTACCGCCAC GTCAAGGATA AAGCTGTACC GGTAGGACTG  
28200  
AGGAGGACGA CGGACGACAT ACATACTGAT GTCAGACGAA CCTCTAGCCT CTTCTGCCCC CCCGCTTTC CTCCCTTGCA TCACCTCCAT AGATTTTTTAC  
28300  
TCCCATGTGC CGCTTCCACT GTTATCAAAG TGCCGTTTCCAG TACTCCATGT GTGTGTGTAT GTGGCTGTGG CTGTAGCCGT GGGGGCATCT CCTCGCTTCT  
28400  
TCCTGTTTTG CTGCTGCTT TCTCTCTCAG ATTAGTACCT GCATCTCGTT CATGCATTC ACGACGCCCC TGCAGGGGA AATTGACCG AAGTATCGAC  
28500  
AGGTCAGCAT GCGCTTGTAC ACGTAGACAT GTCTTACGCG CTCACTCACT CCATCCAACA CGACATCATT CTTATTCATT TCTCTTTTTA GTTTTTTGT



28600  
 TGTGCTTTGC CTCTCTCTTC TTCTCATCG TTGTTACGTT TCAGGATTGC ACCTCACCGC GTTCATCTCC GCCTTCCCCT TTCCCGCGCA CCTCCACACA  
 28700  
 GCGGAGCACG TACCCACGTA CACCTACACC GAAAACACCA GTGCACATGT TTCTTCCTCT ATTCCCGTGT ATCTCTGGCC TCGTCTCTCC ACTTCCTCCC  
 28800  
 GCTCTTCTTC TCTCTTTCT TACGTTTCAT GCGCTTCTT GTTTTTTTTT TTTTTTCGTC CCCTACCCGT CTCACCCCGA TGTGATTTCCG CTCTCTCTCG  
 28900  
 CTCTCGCTCT GTCTCTTTCT CTCCCATCTT TTCCTTCATC GATTCACCCG CCTCGGCTCT CTCTCTCTCT CCTCATGTGG GCACTATTCC TCTCTGTCTT  
 29000  
 TCCTCCTGGC CGTGTTTTTG CCTGCGTGTG CGTGCAGGTT TTCTTTCGAA TGTGGGGTCG CCCTTGTTAG TCAGCCTCTC GCACTCTGCT TCTCGTGTCCG  
 29100  
 TCGACGTTCC TCGTGTTCTT CTCGACTCAC GTAACGTGCG TGTGCAGCTT GTCTGGTAGA TTGGGCCAAT AAAGGCGTGG CTACGCTCCT TCTCCCTCCC  
 29200  
 CTAATTCCTC GCCTCATCGT GTATACACAC CCACAGACAG ACACACAGCC ATGGCTGACC CTATCCCTTT TCCTTCGTAT TACTTTCACC GTATTCGGCC  
 29300  
 TTCCTTGTTA TGATGTCGCG TCGGTGTGCG TGTGCGGGCG TCTGTGCGTG GAGGGGGTG AGTGCACGTG TGTGCGGGAG CTATCCTTCT TCCTCCTCCC  
 29400  
 CGTCGTCTAC CTCTCTCCC TCTTCTCCGT CTGTGTGTCT GACTGATGTC ATCACAGCGG GACGTCTCGC CGAGAAACCA ATGATGGAAG GATAGGATCG  
 29500  
 CGGATGAGCA ATCAGCACGC CCACACACCC TCTCACCGCA ACACACGTGC AAATGCAGAA GACACAGAGA AGCGTGAGGC ATAGCGAAAA GTCCAGGACC  
 29600  
 AAGTGAACGC GTGGTGAGGA GAGCGGCGGG GACAGCCTGA GGCCTCGTGG TGGACACCAA GAGGGAGGCG GTGGCCTGTC GAAAATATTC TTATGGGGCT  
 29700  
 GTATGACGCA CCTTTTACGG GCTCGTCAGT GTTCCGCCTG GTTGCCCTTG CCATTCCCGT CCTCTCTTCC CCAACACCGT TCTCACTCCT CCTTTGTGCA  
 29800  
 CTGGGCTGCC TCCTGCATGC ACTAGCACCT ACAGGGTTCA GGTGTCTCAT CTTTTCCCAT ACCCCCCCTC TCTCTTTCA TTTCTGCATG CTCGTCTCTC  
 29900  
 GTTCTCTCAT CACTGCGCTG GTCCGTGCCC ACTGACGCTC ATCATGCGTA CCTTTGACGT CTGCTGTTGA CTCGTGAGAA TCGAACCGAC GGAAAAGAGA  
 30000  
 GTCATTTACA CGGGTGC GCG ACAAAGCATA GAATCACACG CGCACAAGAA GCGAAACCAT CAGTCAACTG CTTCGATGGC CAAACCCCAA TCACCTCCGA  
 30100  
 ACGTTTTTTTT CTCTTCTTG TTCCATTAG GCTCCGCTGC TGTGCAGTAG TGAAGTACGA GAGGCGCGTA CACACAAGT CAACAGAGGT GAAAGAGCAG  
 30200  
 CACACGAATT CGCCTGCTC AGTCCAGAGA TTGCGCGCCT CTGTGTGTGT GTGTGTCTCC TCAGCACTAG CCGAGACCTC ACTTTTCTAG AGACGCAAGA  
 30300  
 CCCGACAAGA ACGACTAAAA GGAGAGGCGA GTCACCTCAA AGACGCCCGC ACGCTCTCCT AACTCTGTC CTACACGCGC TCCAGTTAC GGCGCCGCAA  
 30400  
 CCCACAAAAC GACGCCAGAA GTCAAACATT CCCTCCCCCT CCTACTTGTT TCTCTCCTTT CTCTCTCTCT CTTGAGAGGT TGCACATAGA CGCGAAATAC  
 30500  
 AGTATCTACA ACAGCAGAGT AGACTGGGAG CAGCGTCGTT GTAGTCACAC CTCGCTCCAA TCAGTTGCAG ATCTCGTACA GGGAGGGGG AGCAGGCACC  
 30600

ACACTGGCTG CTGTTGGTAC GCCGCGCATA CACCAACGCA CTCGACGGCT TGAAGGGAGC GAAGGACGAG GTACCAAAAC TTCAGCCGCT CCGCCTTTTT  
30700  
TAGTGTTTTT CTTTTTTCCT CTTTTTCGTT CTCCAAAGGA GGGCTGCACC TCTACGGCTG AGCAGTGCTC AATTCGAGCT GCAGACTGAG CCATGACGGA  
30800  
ACTCGTGCCA TCCGAGGCGG TGCGCTTCGC CAACGGAGAA CCCCTCTGCA CGTACCAGGA GTGCTACCGG TGCTTTGACG GCCGTGACAT TCTTTTCCGC  
30900  
CTGGTGAACG TCGAGAAGAA TCAGTGGTTC TTCTACAACG ACACCACTGA CGTGCTTGTTG CATGTGCGAG CGGTGTTCCT CCCCAGTAGT GTCATCCGAC  
31000  
CGCTGCAGCG AGCAGATATG CGCGTAATCC CTGGCCCCAC TGGCGTAACA GACGAGACGT GCTCCATCGA GGTGATGCTG GACGTCGACC CCGGGTTCAC  
31100  
GGAGTCGTTT ATCGAGGGAG AGCCCAAGGG CTTTCACCTA AACTTTCGCA CAGAAACCGC GCCAGCAAAA GATGTCGTCT TTGAGCACCA CCGGCCGACC  
31200  
GTGCAATACG ACAAGATCTA CCGCTGCTTC AAGGATGGCA ACGGACTGCT GTTTCGCCTG GTGGACGAGC ACGCACATCG GTGGTTCTTC TGCAACGATA  
31300  
CTCGCGACAT GATGATGAAG GTGACCGTGA CGTTTGCAGG CCGCGCAGAG GTGCGCCCGC TGGAATGCAC AGTTCCTGGT CCGCCACCCC CCGCCAACGC  
31400  
CGCCCCGAG AGCGTCGTCT ACACCCCTCCT TATCGCGCCC GGGTGCACCG AGCCGTTTCAT TGAGGGGAAT CCGGTGACGT ACACGCTGGA GTTTTCTGCC  
31500  
GAGCCAGTAA ATACTTCGAT CACGCCCACC ACAGAGGAGC CGGTGGAGTA TCTGTACGGC AGCCCCGACC GCGCCATCAT TCCCCACCAG ATGCACGTGT  
31600  
TCAAGTGCTT CAAGGAGCAC GGCAACGGGC TGCTGTTCGG TGTCGTTGAT GATGTAAATA CAATTTGGGC CTTCTACAAC GACACGCCGG ACTACGTGAT  
31700  
GACTGCGAAT ATGCGCTACC CGCAAACGAG CGACATACGC CTTGCTCCGG GGGTGCAGGT GATTACCGAC AGCGAGCGCG AGGGCGGTGT CATTGCAGCT  
31800  
GTCGAGGTGA TGCCCCTCGC CACAGTGCCG TTTCTCGTTG GTGTCCCGGA GCAATACGAG TTGACTTTCA CAGCCACCCC TGTTACCACT GTGACGCCAT  
31900  
CGCTGACCAC CCAAGTGGAG CCGAATCCCT CACCCCTCCC CGCCGACGCA ACGGGCCCCG CTGCGGTGCC GCCCCCGGTG CTGCCGGTTC CCGAAGAGGC  
32000  
ACCCGTCTAC TGCCACCGCG GACCGGATCT CGCCGTAATG CCACACTTTG ATGAGGTCTA CAAGTGCTTC AAGGACTACG GGAACGGGCT CGTATTCCGC  
32100  
CTCGTGGACA GGACGCAACG CCGCTGGGCC TTCTACAACG ATACTTCTGA CGTTGTTCGG TTGGTGAGGG TCGAGTTTCC TCCCGGCGCT TACATTCAAC  
32200  
CGTTGGGGCA TACAGTTCTG GGCCGCGATC CAGAGACCGG TAGCGTCCTT TACGAGCTGC GCGTGAATCC CCTCGAGACA GCGCTCTTTG TGGAAGGGGA  
32300  
GGTGGACATC TTCGCCACAA AGTTTGTGGC GGAGCAAAT T CAGACATGAC GATCTCGAAC TGCATCTTCC GATGCGGCGA GCGTTCGAGA GAGGGAGAAA  
32400  
GCATCGCTCC TCGGAGCTGC ATTGTTGAGG TAGAGGCGAT GGGAGGTATT GCTCTACGCG CTGTGCAACC ATGTTATATA CCTGTGCAAC GCACGCACGG  
32500  
ACGGTGTGAG ACTCCTGTGC TGACAATTTG CGCTGCTCTT TCTTGTGCAC CCTTTTCCC CTTCACGTCC ACTTGGACGC GGATGTGGTG GTTTGTGGTT  
32600  
TGGGAGGCTT CTCTCTTAC GCGACGTCTG ATGTCACCTC AGCACTACCT CTCCCTCTCT CGTGTCTCTT TATTAAGTTG GAGGTGGTCA TGCTGTACCG



CGAGTATGTC CTCGTCACGA TTCCGCTGCA GGACACCACG GGTGTAAC TGAGATCAA GGATGAAGGG AGGGAGCTAC TGTTGCGCTG CTGCGCCCC  
34800  
GAAGGCAAGC AGTACGCATG CACGATCCAC TTTTACGGCG CGATATCCTC TGAGGAGAGT CAGCACGTGG TCGGCGCGCG TCAGATCGAG CTGAAGCTGC  
34900  
GGAAAAAGCT AACAAAGGTCA CTTGAAGACG CCGACGACGA GGTGGAGTGG CCGCGGCTGA CCAAGGAGAA GGTCAAATAC CCTAACATTA CCATCGACTG  
35000  
GTCTAAGTGG AAAGACGAGG ATGACGAAGG TGCTACAGAC GACTTGGGGG ACTTCGGCCT CGGCGGCGGC GACGCGATGG ACGGGCAGTA CTCGGAGATG  
35100  
CTCAGTCAGC TCATGCAGAC GCAGGGAAAG AAGGACGCGG AGGAATTAGC CGGCC TTCCA CCCGGCACGA TTCCTGAATT TGGCTCGGCG CAAAGGCAAG  
35200  
AGGCCACTCA CGGCGCATCT GCGGCAGCCG GAGATGATGA CAGCGAGATG CCGCCGCTCG AGGACGATAT GTGAGGGGAT GCGAGACAAA CTGCTCAATT  
35300  
GACCTGTGGC GCCGCTCTGC CGCTGCAGCC ATGCAACCCC ATACCGGGTCT TTTTCTCTTT GTCACACACT CTTTCGATCT GCGTCTCGTG ACGTGGGACG  
35400  
CGGCGCAGGC TCGCGGAGGT GCACTGCTCA TAAGTTAAGC GGCAGAAAAC CTCCTCCCTT CATGTGTCTT TCCCCTATTA CCATCCGATC TCTCCCATAC  
35500  
AACCAAGCCA ATACGATGAA TAGGCGCGGA AACGATGGCC TGCCACCCT GCATGTTGCT CTGCACAGAA CTAGTCGAGA AAAGGCAAAA GCCAACGCGT  
35600  
TTCCATTGTC CTGCCATCTC CGCCTGGAGC ACCTCGCGAG TTTTGCTTCT CCCTCCCCC TCCCTCTTCC CCAACGTGGC CACCACAGTG GGGAGGTGAC  
35700  
CTCCTCCCAC ACCCCTCTCA TCAGCCGCAC CCCTTGTCGC CTTTGAAACT CAAGCGCCTG TAGTGTGTGT GTGCCCTCTA ATGTTGTCTT TGCCTTACT  
35800  
CCCTTTGACT CTCTGCTGCC TCTCTCGCTC GCTCGCTTAT TTTTCTTCTC GGTGAGCTGC ACGCGTGACC CCCTCCCTCT TCTACGTTTG CTGTGACCGA  
35900  
AAAACTCGGC GGAGGCTATC TCATCACGGC GAGCGAAAGA GTCGAACTGC ATAATTTTCAG GTTCAAACCA ATCGCCTCAC TCTGAAAGCG GACTGTCTGT  
36000  
ACGTAGCCTT GGAGGCTCGG TGGCAGACCG AGACACAGGC ATTCCTAGAG AGGGAGGGGT GTTGATGCAG CCCTTATAAA GGAAGCGAAA ATGCGGAACC  
36100  
AAAGAGCGCA GTGCCTGGCG CTTCTTGCGA ACCTTCTGCT GTTCGCAGCA GCGCGCAGG CCGCCATCTC CTTCAAACCTC AACAGCATCG ACTATCTGTC  
36200  
CTACGCTGAC GAGAAGATGT CTATGAACGA GTACGCAGTG CTGCCAGGAG GCAGCGGCGC ATGCCTACTG TTGTGCTGG ACAACGGACT GGGCGGTGTC  
36300  
GTACGCTTTA CCTATGCGTC GAACGTGTCG AACGTGCACT GGCCTCCGA CGTGGTGGTG TCGGTCCACA AGCCAAGCGT CTCGCAGTTC TCCATGGCGG  
36400  
TTCTCGACAA GGTCGACGCC GTCATTCAA CGAAGCTCTT CAACGCTGTG GAGTTGGCGA GACTGCACAG GCCGAATGAG GTGGTGGGTC GCGGCACCGA  
36500  
GCGACAGGAA ATTGCGAATG CCAGCGCTAA GGTGAAGCAG CAGTCTCAGA GCACCACGGT GAGCATTCGA CCGGCGCAGG ACGGCACCGG TCCTGCAGCG  
36600  
AAGTTTATCG ATGGTACTA CGCTGTATGC TTTCACCTCC TTCGCTCCAA GCGGTTGGCG CAAAAGCCAC CGTCGATGCA GTACGAGCAG GTGAAGGTGC  
36700  
AACTTATCGA GGTGGTCTCC ACGCGCCACT CCACCTCTCT CTACATCGCA AGACTTAATG ACAACGCCGC AAACCTGCAG AATGGTGATG AGACGGCAGG



GGGTCGACAA GCTTCGCTCT GCCTTCGCAG ATCCAGTGGA GGCACGCCGA AAGGTCGCTG CTTGGAGGA TGAGCGAGAC CGCCTGCAGG GGTACATCGA  
38900  
AGTCGCCCTC AAAAAGTTGG TGGCTGTGCC GGAGAAGGAG ATGCTCCTGG CATTACAGCAA GTCCTCCGC ATGGCACGTG AGGAGAGCGC CAAGCTGGCT  
39000  
GAGCGAGAGG TGGAGCAGCA GCAGGCCACG GTGTCTTCTG AGGCCCGCCG CACAGAAATC AACACACGTC TGCAGAATCT CCGCCGCGAC GCAGCGGACG  
39100  
GCCGCGTCGA GATGATGATC CGGCGCATGA AAGACGAGAT GGACACAAAC CGGATGAAGC TGCAGGATCA GCTACCGCAA GAGCTTGAGT CCATCACGAA  
39200  
CGAGAATGCC GAGCTGCAGA AGCTCGTCTC GGAGCCGCTG GACATGGCAG CGCTCATTTG AAAGGATCCC TCTTAAAAGC ATCATGTCTG TGCCTTTTTT  
39300  
CAACCAGGCA TCTGAAGGTG CTGTTTATAT CACTTACAAT CCTGACACTG AGAGACGTAA GTGGAGGGTT AAAAAACAAC GTAAGAAATG TGTGTTTTTA  
39400  
TTTCTGCCAA ACGAAACAGA AGCTCTCAT TGGGCATCTG ATATCACACG GCGGTTTCG GATTTAACTC CCGAGGAATG AATTGGTTGC TCTTCTTTTA  
39500  
CCACCTCTGC TCAGACAGTC CTTTTTTTCT CCCCCCTCCA GCGCTTTTTT TTTTCTCTA TATATCCCTC TCTCTCTGTT TTGACTGGAA TATTATCCCT  
39600  
ATTGTTTTCT TTCTTTTTTT TTTGTTTTTG TTTTTCTTT TTAAGACA AATCAGCGAA GACGTGTCTT TCCTCTTTGC GTGATGAGGA TGAAAAGTGC  
39700  
ATTTGCCTTC GCACCCCCC CCCCTTTGGG GGTACGCATC GCGACACGCC GTGGCTTGTG CTCACACACC GAAGGTGGTG TTCTCTGTTT TTGGTGGCAA  
39800  
GCTGGATTTT ATCTTGTGTT GCGGGTTTTT TTTTTCTCT GAGCCTCATA ACTATGCGTT TTTTTTTTTT TTTACTTTTA TTGCCGTCTC TTATTTATAA  
39900  
TGTGTTGCC AGCCACATG ACTCAATTGT CGCCGAAGGA TGAGTACACA CGTGCCTGCA CAAAATTAGG CTGTCATGTC AATCCCATC TCATGAGAGA  
40000  
ACTTCCCGAC ACGTTGGAGG CGTTGATTGC CGTTAAAAA CTTGACTTTT CGCGTAGCAT GTTGGGCCGA AGTGACGTTG AGCCGCTTGT GCAGGCCATT  
40100  
CTTTTCCACT GCTCGGGCCT CCAGGTGCTG AATCTCTCGC AGAACTACCT CACCGATGAC AGCATGTGAC AAATATGTGA GGCTCTCTTG GCACACACGT  
40200  
TACTTCTCGT TTCCTCGAT CTCTCCAACA ACCCATTTT CAACAAAACG GGGCGATATC TTTTACGCTT CATGGAAAGC ATGCCCGCAC TTCGGTTTGT  
40300  
TGCGGTACAA AAGACTCA TGAATGACAG CATGATGCGC CTGTTCCCGC ATTCAAGCAA AGCACTCTGT CTTCTGTGG CGGAGCACAG GGCCAGCACT  
40400  
CTCTTACCG CCGTCACCGT GGCAACGTCC AACATTTCCA GCATCATGAA GACCAGCCCG TCAAGTAGTT TGCAGAAAGC AACGAAGGAC GACAATCCGC  
40500  
ATCCGTCTCA GAAAACACAA TGGCCAGCAC TTGAACTTT ATGGAGGGCC GCGGCAGTAG CTGCCCTAC CCACAACAAC TACTCTAGTC TAGGCACCCT  
40600  
CATTTATCT ATGCGTATCC GCATTCAGGA AGTGAGCGAA GTTCAACAGT TGCCAGTTT TTCAGGAGAC TCAAAAAAC AGACACAACA GTCTTATTAG  
40700  
ACAAGAGCAC AAACAAATTC TCATTGCATT CAGAAGCAA CAAACAAACA AAAACAAAAT GCGGAAAATA CCTCAAATTT ATTTTATGTC TGTCCTCTAC  
40800  
AAATAATAAT AATAATAATA ATAATTACAG CGGCCGTAAA TGAATGCAAG AAAAGAAACA CAAAACCCAC AATTGTCAAC CTCCCCTTCA TTCCACTTGT

CTCTCTTTTC CCACGTTTCC TGCACGAATG CAGAAAGTGA TATTTTTACT TTGAAAGCCA TCTACCAACA ACAATTACAT TGAACAGAAT TTGGGAATTG 40900  
 CGAATTCGCG TGTGGCCTCG AACACCGAGC GACCCTGCAG CCAATATGGG ATCGGCCATT GAACAAGATG GATTGCACGC AGGTTCTCCG GCCGCTTGGG 41000  
 TGGAGAGGCT ATTCGGCTAT GACTGGGCAC AACAGACAAT CGGCTGCTCT GATGCCGCCG TGTTCGGCT GTCAGCGCAG GGGCGCCCG TTCTTTTTGT 41100  
 CAAGACCGAC CTGTCCGGTG CCCTGAATGA ACTGCAGGAC GAGGCAGCGC GGCTATCGTG GCTGGCCACG ACGGGCGTTC CTTGCGCAGC TGTGCTCGAC 41200  
 GTTGTCACTG AAGCGGGAAG GGACTGGCTG CTATTGGGCG AAGTGCCGGG GCAGGATCTC CTGTCATCTC ACCTTGCTCC TGCCGAGAAA GTATCCATCA 41300  
 TGCTGATGC AATGCGGCGG CTGCATACGC TTGATCCGGC TACCTGCCCA TTCGACCACC AAGCGAAACA TCGCATCGAG CGAGCACGTA CTCGGATGGA 41400  
 AGCCGGTCTT GTCGATCAGG ATGATCTGGA CGAAGAGCAT CAGGGGCTCG CGCCAGCCGA ACTGTTCCGC AGGCTCAAGG CGCGCATGCC CGACGGCGAT 41500  
 GATCTCGTCG TGACCCATGG CGATGCCTGC TTGCCGAATA TCATGGTGA AAATGGCCGC TTTTCTGGAT TCATCGACTG TGGCCGGCTG GGTGTGGCGG 41600  
 ACCGCTATCA GGACATAGCG TTGGCTACCC GTGATATTGC TGAAGAGCTT GGCGGCGAAT GGGCTGACCG CTTCCCTCGTG CTTTACGGTA TCGCCGCTCC 41700  
 CGATTCGCAG CGCATCGCCT TCTATCGCCT TCTTGACGAG TTCTTCTGAG GGGATCGATC CGTGACACAGG CGTTAGCCAC TCTCAGGATT GCCAGCAAGT 41800  
 CTTCTGAATT TGATCTTTGG ATGCTCGGGC AGCTCAAAGA GGAATCTTAG TCACAACCTG CCGAAGGAGC GCCGCTTCTT CAAGATTGTG TCGTGGTACG 41900  
 ACAACGAGTG GGGATACTCC CACCGCGTGG TGGACCTTGT ACGCCACATG GCCTCGAAGG ATCGTTCGGC AAGGTTGTAG GCGTGGCGAT GACTTCAGGT 42000  
 CTTTCTTTTG CGAATAGGGA TCTTATAATA CACGATGCGT GTCCCGTGAT GATCGTTACC GGTGCTGCCA CGATCCAAGT GACACAGTGT CAAGAGCAAA 42100  
 ACAATTTTAC TTTTCCCTTT AAGGACAACA ACAAAAAAAT ATATAACTTT TTTTCTTTT TTTTTTTTTG AAATTATATT TATGGTCATC TTTGGGAAAC 42200  
 AAAAAGCAGC AATTTAATGA TGCGGAAGGA TGAGTGAAAT AATGTTAAT CAATGTACGA GGATTGGGG TATTGCAAGG AAAATGTAGA TGATTTGATT 42300  
 GGGTGTATGA TGCAGCTTGT GGTAATTTTT TACAACCTTG CGTTATTGGA AGATTTTGGT TGTTCAGTTT CTTTTGTTT ATAACTGACT GTTTTAATTT 42400  
 AGTGTGATTT TTTTTTTTTA AGGATTTAAG CTGTTTTTCT TTTTTTTTCT TTTTCTTAC TGATGGTGTT TAAGGTGTAG TTTAGTGTTT GTGCATTATG 42500  
 CGTCGTAGTG TTGTTGTTCT TTGGACTTTT TCGAACAATA CTGGGCATTA TAGCCACCT GTGTATATGC CGCTAGAGTA TGCTAGCCGT GTGACAAACC 42600  
 AGAAGCAACT AGTGTTTACG CATCCAAGG ATCGATCCGT CGACCGATGC CCTTGAGAGC CTTCAACCCA GTCAGCTCCT TCCGGTGGGC GCGGGGCATG 42700  
 ACTATCGTCG CCGCACTTAT GACTGTCTTC TTTATCATGC AACTCGTAGG ACAGGTGCCG GCAGCGCTCT GGGTCATTTT CGGCGAGGAC CGCTTTCGCT 42800  
 42900

GGAGCGGAC GATGATCGGC CTGTGCTTG CGATATTCGG AATCTTGAC GCCCTCGCTC AAGCCTTCGT CACTGGTCCC GCCACAAAC GTTTCGGCGA  
43000  
GAAGCAGGCC ATTATCGCCG GCATGGCGGC CGACGCGCTG GGCTACGTCT TGCTGGCGTT CGCGACGCGA GGCTGGATGG CCTTCCCCTAT TATGATTCTT  
43100  
CTCGCTTCCG GCGGCATCGG GATGCCCCGG TTGCAGGCCA TGCTGTCCAG GCAGGTAGAT GACGACCATC AGGGACAGCT TCAAGGATCG CTCGCGGCTC  
43200  
TTACCAGCCT AACTTCGATC ATTGGACCGC TGATCGTCAC GCGGATTTAT GCCGCTCGG CGAGCACATG GAACGGGTTG GCATGGATTG TAGGCGCCGC  
43300  
CCTATACCTT GTCTGCCTCC CCGCGTTGCG TCGCGGTGCA TGGAGCCGGG CCACCTCGAC CTGAATGGAA GCCGGCGGCA CCTCGCTAAC GGATTCACCA  
43400  
CTCCAAGAAT TGGAGCCAAT CAATTCTTGC GGAGAACTGT GAATGCGCAA ACCAACCTT GGCAGAACAT ATCCATCGCG TCCGCCATCT CCAGCAGCCG  
43500  
CACGCGGCGC ATCTCGGGTA ACCGTCAGTG CCGATAAGTT CAAAGTTAAA CCTGGTGTG ATACCAACAT TGAAACGTTG ATCGAAAACG CGTGAAAAA  
43600  
CGCTGCTGAA TGTGCGGCGC TGATGTCAC AAAGCAAATG GCAGCAGACA AGAAAGCGAT GGATGAACTG GCTTCCTATG TCCGCACGGC CATCATGATG  
43700  
GAATGTTTCC CCGGTGGTGT TATCTGGCAG CAGTGCCGTC GATAGTATGC AATTGATAAT TATTATCATT TCGGGTCTT TCCGGCGAT CCGCCTTGTT  
43800  
ACGGGGCGGC GACCTCGCGG GTTTTCGCTA TTTATGAAAA TTTTCCGGTT TAAGGCGTTT CCGTTCCTT TCGTCATAAC TTAATGTTTT TATTTAAAT  
43900  
ACCCTCTGAA AAGAAAGGAA ACGACAGGTG CTGAAAGCGA GCTTTTTGGC CTCTGTCGTT TCCTTCTCT GTTTTTGTCC GTGGAATGAA CAATGGAAGT  
44000  
CAACAAAAAG CAGTGGCTGA CATTTTCGGT GCGAGTATCC GTACCATTCA GAACTGGCAG GAACAGGGAA TGCCCGTTCT GCGAGGCGGT GGCAAGGGTA  
44100  
ATGAGGTGCT TTATGACTCT GCCGCCGTCA TAAAATGGTA TGCCGAAAGG GATGCTGAAA TTGAGAACGA AAAGCTGCGC CGGGAGGTTG AAGAACTGCG  
44200  
GCAGGCCAGC GAGGCAGATC CGGAATCCG GATCTGATCC TTCAACTCAG CAAAAGTTCG ATTTATTCAA CAAAGCCGCC GTCCCGTCAA GTCAGCGTAA  
44300  
TGCTCTGCCA GTGTTACAAC CAATTAACCA ATTCTGATTA GAAAACTCA TCGAGCATCA AATGAACTG CAATTTATTC ATATCAGGAT TATCAATACC  
44400  
ATATTTTTGA AAAAGCCGTT TCTGTAATGA AGGAGAAAA TCACCGAGGC AGTTCCATAG GATGGCAAGA TCCTGGTATC GTTCTGCGAT TCCGACTCGT  
44500  
CCAACATCAA TACAACCTAT TAATTTCCCC TCGTCAAAAA TAAGGTATC AAGTGAGAAA TCACCATGAG TGACGACTGA ATCCGGTGAG AATGGCAAAA  
44600  
GCTTCGAGGG GGGGCCCGGT ACCCAATTCG CCCTATAGTG AGTCGTATTA CGCGCGCTCA CTGGCCGTCG TTTTACAACG TCGTGACTGG GAAAACCTG  
44700  
GCGTTACCCA ACTTAATCGC CTTGCAGCAC ATCCCCCTT CGCCAGCTGG CGTAATAGCG AAGAGCCCCG CACCGATCGC CCTTCCCAAC AGTTGCGCAG  
44800  
CCTGAATGGC GAATGGGACG CGCCCTGTAG CGGCGCATTG AGCGCGGCGG GTGTGGTGGT TACGCGCAGC GTGACCGCTA CACTTGCCAG CGCCCTAGCG  
44900  
CCCGCTCCTT TCGCTTCTT CCCTTCCTT CTCGCCACGT TCGCCGGCTT TCCCCGTC A GCTCTAAATC GGGGGCTCCC TTTAGGGTTC CGATTTAGTG



CTTTACGGCA CCTCGACCCC AAAAACTTG ATTAGGGTGA TGGTTCACGT AGTGGGCCAT CGCCCTGATA GACGGTTTTT CGCCCTTTGA CGTTGGAGTC 45000  
 CACGTTCTTT AATAGTGGAC TCTTGTTCCT AACTGGAACA AACTCAACC CTATCTCGGT CTATCTTTTT GATTTATAAG GGATTTTGCC GATTTTCGGCC 45100  
 TATTGGTTAA AAAATGAGCT GATTTAACAA AAATTTAACG CGAATTTTAA CAAAATATTA ACGCTTACAA TTTAGGTGGC ACTTTTCGGG GAAATGTGGC 45200  
 CGGAACCCCT ATTTGTTTAT TTTTCTAAAT ACATTCAAAT ATGTATCCGC TCATGAGACA ATAACCCTGA TAAATGCTTC AATAATATTG AAAAAGGAAG 45300  
 AGTATGAGTA TTCAACATTT CCGTGTCCGC CTTATTCCCT TTTTTGCGGC ATTTTGCCTT CCTGTTTTTG CTCACCCAGA AACGCTGGTG AAAGTAAAAG 45400  
 ATGCTGAAGA TCAGTTGGGT GCACGAGTGG GTTACATCGA ACTGGATCTC AACAGCGGTA AGATCCTTGA GAGTTTTTCGC CCCGAAGAAC GTTTTCCAAT 45500  
 GATGAGCACT TTTAAAGTTC TGCTATGTGG CGCGGTATTA TCCCCTATTG ACGCCGGGCA AGAGCAACTC GGTCGCCGCA TACACTATTC TCAGAATGAC 45600  
 TTGGTTGAGT ACTCACCAGT CACAGAAAAG CATCTTACGG ATGGCATGAC AGTAAGAGAA TTATGCAGTG CTGCCATAAC CATGAGTGAT AACACTGCGG 45700  
 CCAACTTACT TCTGACAACG ATCGGAGGAC CGAAGGAGCT AACCGCTTTT TTGCACAACA TGGGGGATCA TGTAACCTCGC CTTGATCGTT GGAACCCGGA 45800  
 GCTGAATGAA GCCATACCAA ACGACGAGCG TGACACCACG ATGCCTGTAG CAATGGCAAC AACGTTGCGC AAACCTATTAA CTGGCGAACT ACTTACTCTA 45900  
 GCTTCCCGGC AACAATTAAT AGACTGGATG GAGGCGGATA AAGTTGCAGG ACCACTTCTG CGCTCGGCC TCCCGCTGG CTGGTTTATT GCTGATAAAT 46000  
 CTGGAGCCGG TGAGCGTGGG TCTCGCGGTA TCATTGCAGC ACTGGGGCCA GATGTAAGC CCTCCCGTAT CGTAGTTATC TACACGACGG GGAGTCAGGC 46100  
 AACTATGGAT GAACGAAATA GACAGATCGC TGAGATAGGT GCCTCACTGA TTAAGCATTG GTAACGTCA GACCAAGTTT ACTCATATAT ACTTTAGATT 46200  
 GATTTAAAAC TTCATTTTTA ATTTAAAAGG ATCTAGGTGA AGATCCTTTT TGATAATCTC ATGACCAAAA TCCCTTAACG TGAGTTTTTCG TTCCACTGAG 46300  
 CGTCAGACCC CGTAGAAAAG ATCAAAGGAT CTTCTTGAGA TCCTTTTTTT CTGCGGTAA TCTGCTGCTT GCAAACAAAA AAACCACCGC TACCAGCGGT 46400  
 GGTTTGTTTG CCGGATCAAG AGCTACCAAC TCTTTTTCCG AAGGTAACGT GCTTCAGCAG AGCGCAGATA CCAAATACTG TCCTTCTAGT GTAGCCGTAG 46500  
 TTAGGCCACC ACTTCAAGAA CTCTGTAGCA CCGCCTACAT ACCTCGCTCT GCTAATCCTG TTACCAGTGG CTGCTGCCAG TGGCGATAAG TCGTGTCTTA 46600  
 CCGGGTTGGA CTCAAGACGA TAGTTACCGG ATAAGGCGCA GCGGTCGGGC TGAACGGGGG GTTCGTGCAC ACAGCCCAGC TTGGAGCGAA CGACCTACAC 46700  
 CGAACTGAGA TACCTACAGC GTGAGCTATG AGAAAGCGCC ACGCTTCCCG AAGGGAGAAA GGCGGACAGG TATCCGGTAA GCGGCAGGGT CGGAACAGGA 46800  
 GAGCGCACGA GGGAGCTTCC AGGGGAAAC GCCTGGTATC TTTATAGTCC TGTCGGGTTT CGCCACCTCT GACTTGAGCG TCGATTTTTG TGATGCTCGT 46900  
 47000

CAGGGGGGCG GAGCCTATGG AAAAACGCCA GCAACGCGGC CTTTTTACGG TTCCTGGCCT TTTGCTGGCC TTTTGCTCAC ATGTTCTTTC CTGCGTTATC  
47100  
CCCTGATTCT GTGGATAACC GTATTACCGC CTTTGAGTGA GCTGATACCG CTCGCCGAG CCGAACGACC GAGCGCAGCG AGTCAGTGAG CGAGGAAGCG  
47200  
GAAGAGCGCC CAATACGCAA ACCGCCTCTC CCCGCGCGTT GGCCGATTCA TTAATGCAGC TGGCACGACA GGTTTCCCGA CTGGAAAGCG GGCAGTGAGC  
47300  
GCAACGCAAT TAATGTGAGT TAGCTCACTC ATTAGGCACC CCAGGCTTTA CACTTTATGC TTCCGGCTCG TATGTTGTGT GGAATTGTGA GCGGATAACA

AT
